# Supplementary material
Source: HighWire-hosted journal article supplement (https://qualitysafety.bmj.com/highwire/filestream/159108/field_highwire_adjunct_files/0/bmjqs-2020-011684supp001_data_supplement.pdf)
Supplement: bmjqs-2020-011684supp001_data_supplement.pdf [file bmjqs-2020-011684supp001_data_supplement.pdf]

## Effects of Night Surgery on Postoperative Mortality and Morbidity

### A Multicentre Cohort Study

#### Supplement 1

|          |                                                                                                        |           |
|----------|--------------------------------------------------------------------------------------------------------|-----------|
| <b>1</b> | <b>Data sources</b>                                                                                    | <b>4</b>  |
| <b>2</b> | <b>Categorisation of confounding variables</b>                                                         | <b>4</b>  |
| <b>3</b> | <b>Multiple Imputation</b>                                                                             | <b>5</b>  |
| <b>4</b> | <b>Potential causes of 30-day mortality</b>                                                            | <b>5</b>  |
| 4.1      | Postoperative acute kidney injury                                                                      | 6         |
| 4.2      | Postoperative major adverse cardiovascular events (MACE)                                               | 7         |
| 4.3      | Postoperative stroke                                                                                   | 7         |
| 4.4      | Postoperative reintubation                                                                             | 7         |
| <b>5</b> | <b>Mediation analysis</b>                                                                              | <b>8</b>  |
| 5.1      | Potential impact of provider variability on the association between night surgery and transfusion rate | 8         |
| 5.2      | Case delay as potential mediator                                                                       | 9         |
| <b>6</b> | <b>Sensitivity analyses</b>                                                                            | <b>10</b> |
| 6.1      | Robustness of the primary analysis to analytic approach                                                | 10        |
| 6.2      | Potential modification of the primary analysis by a one-year diagnosis of cancer                       | 11        |
| 6.3      | Subgroup analyses                                                                                      | 11        |
| 6.4      | Sample size justification in a subgroup of emergency patients                                          | 12        |
| 6.5      | Effect of specific time windows                                                                        | 13        |
| 6.6      | Effect of weekend surgery                                                                              | 13        |
| 6.7      | Analysis by year of surgery                                                                            | 13        |

|                                                                                                                                                         |           |
|---------------------------------------------------------------------------------------------------------------------------------------------------------|-----------|
|                                                                                                                                                         | 2         |
| 6.8 Mortality starting three months after surgery                                                                                                       | 14        |
| 6.9 Additional confounding variables                                                                                                                    | 14        |
| 6.10 Varying definitions of night surgery                                                                                                               | 14        |
| <b>7 Supplemental tables</b>                                                                                                                            | <b>16</b> |
| eTable 1. Definition of the secondary outcome                                                                                                           | 16        |
| eTable 2. Confounding variables                                                                                                                         | 29        |
| eTable 3. Comorbidities within one year prior to surgery among patients undergoing day surgery versus night surgery in the primary imputed cohort       | 30        |
| eTable 4. Surgical services among patients undergoing day surgery versus night surgery in the primary imputed cohort                                    | 31        |
| eTable 5. Characteristics and distribution of variables by day versus night surgery in the complete-case cohort                                         | 32        |
| eTable 6. Characteristics and distribution of variables by patients who underwent ambulatory/same-day surgery versus inpatient surgery                  | 35        |
| eTable 7. Characteristics and distribution of variables by day versus night surgery in a sub cohort of patients undergoing ambulatory/same-day surgery. | 37        |
| eTable 8. Characteristics and distribution of variables among emergency cases                                                                           | 40        |
| eTable 9. Characteristics and distribution of variables after propensity score matching                                                                 | 43        |
| eTable 10.a Association between major postoperative adverse events and night surgery compared with day surgery                                          | 43        |
| eTable 10.b Postoperative complications stratified by patients who died within 30 days versus patients who survived                                     | 45        |
| eTable 11. ICD-9 and ICD-10 codes to define a recent history of solid/non-solid cancer                                                                  | 46        |

|                                                                                                                |           |
|----------------------------------------------------------------------------------------------------------------|-----------|
|                                                                                                                | 3         |
| eTable 12. Results of 30-day mortality and morbidity categorised by the time surgery started                   | 53        |
| eTable 13. Subgroup analysis of the 50 most frequently performed procedures                                    | 54        |
| eTable 14. Results of additional subgroup analyses                                                             | 58        |
| eTable 15. Results after adjusting for additional confounding variables                                        | 59        |
| eTable 16. ICD-9 and ICD-10 codes to define potential causes of death (validated postoperative complications). | 60        |
| <b>8 Supplemental figures</b>                                                                                  | <b>60</b> |
| eFigure 1. Distribution of emergency and non-emergency cases throughout the day                                | 60        |
| eFigure 2a. Adjusted odds ratios for mortality within 30 days of non-emergency surgery                         | 61        |
| eFigure 2b. Adjusted odds ratios for 30-day morbidity within 30 days of non-emergency surgery                  | 62        |
| eFigure 3. Proportion of handovers between anaesthesiologists throughout the day                               | 63        |
| <b>9 References</b>                                                                                            | <b>64</b> |

## 1 Data sources

Several data management systems were used to compile the final database: Perioperative data (anaesthesia record data, monitored patient parameters) were retrieved from the Anaesthesia Information Management System (AIMS). Clinical variables (electronic health record data including International Classification of Diseases 9<sup>th</sup> and 10<sup>th</sup> revision [ICD-9/10] diagnostic codes) were obtained through the Research Patient Data Registry (RPDR). The financial tracking database, Enterprise Performance Systems Inc. (EPSi), was used to obtain information regarding hospital admission and discharge. Demographics and discharge disposition data were available in a Research Patient Data Registry (RPDR) and Enterprise Performance Systems Inc. (EPSi) and allowed extraction of mortality data.

The Anaesthesia Information Management System (AIMS) as well as the Perioperative Information Management System (PIMS) were utilised for patient data. Anaesthesia-related data were collected from AIMS and surgical data, such as the surgical specialty and duration of the procedure were provided by PIMS. Current Procedural Terminology (CPT) codes to define work relative value units were obtained from the Center for Clinical Computing (CCC) anaesthesia billing database.

International Classification of Diseases (ICD) codes regarding comorbidities and encounter dates were collected from the Admission Discharge Transfer (ADT) and Casemix databases. Data on mortality were retrieved from the Miscellaneous (MISC) database. Data were de-identified and subsequently combined across institutions.

## 2 Categorisation of confounding variables

Confounding variables of the primary model were included according to the linearity assumption. Variables demonstrating non-linear associations with the primary outcome were categorised into quintiles (age, duration of surgery, work relative value units, date of surgery, vasopressor equivalent dose, and SpO<sub>2</sub>/FiO<sub>2</sub>-ratio) or clinically relevant groups (BMI, ASA

status, Charlson Comorbidity Index, intraoperative hypotension (defined as mean arterial pressure < 55 mmHg), and packed red blood cell (PRBC) units transfused.

### 3 Multiple Imputation

For the primary analysis, we imputed missing data by utilising multiple imputation. We conducted five imputations of five iterations each. The variable with the highest number of missing values prior to imputation was BMI (36,937 missing values), followed by SpO<sub>2</sub>/FiO<sub>2</sub> ratio (19,498 missing values), and admission type (4,224 missing values). The variables anaesthesia and surgical provider which were included into the multivariable-adjusted mixed effects model were not imputed. Cases with missing data for the random effects were excluded before imputation.

### 4 Potential causes of 30-day mortality

We additionally analysed the following postoperative complication data that have been validated by our team in previous studies. Details on the definition of complications are provided below. We made comparisons between patients undergoing day versus night surgery: Acute kidney injury (AKI), major adverse cardiac events (MACE), stroke after surgery, and reintubation. There were significantly increased risks of AKI, MACE, acute heart failure, and reintubation among patients who underwent night surgery (eTable 10.a).

We then assessed whether these major postoperative adverse events associated with night surgery occurred more often among patients who died within 30 days after surgery (eTable 10.b). Particularly acute kidney failure (24.3% vs. 3.4%), major adverse cardiac events (13.1% vs 1.9%), and reintubation (16.9% vs. 0.6%) occurred much more frequently in patients who died within 30 days, and occurred more frequently after night surgeries. Both renal and cardiac complications have also been shown to be associated with higher transfusion rates,<sup>1-4</sup> as well as higher frequency of anaesthesia handovers.<sup>5</sup> Information on the data sources and variable creation of the postoperative complication data is given below.

#### 4.1 Postoperative acute kidney injury

##### *Institution A*

Postoperative AKI was identified according to the following protocol: the most recent creatinine lab values prior to surgery, within a 30-day window, and creatinine values within 48 hours after surgery were extracted and the differences between creatinine values were calculated. Patients with an increase of 0.3 mg/dl or 50% or more from baseline in the first 48 hours after surgery were considered to AKI, according to the Kidney Disease Improving Global Outcomes (KDIGO) Guidelines.<sup>6 7</sup> Cases without creatinine values but with an ICD-9 diagnostic code of AKI (eTable 16) within seven days of surgery, but not thirty days prior, were also considered to have this outcome. Finally, cases without data on serum creatinine or AKI administrative codes following surgery were considered free of this outcome on the premise that there was no clinically meaningful concern for kidney injury in such patients. Our definition of AKI was validated by chart review and studies have been published previously using this definition.<sup>8</sup>

##### *Institution B*

Postoperative AKI was identified according to the following protocol: the creatinine lab values prior to surgery, within a 6-month window, and creatinine values within 48 hours after surgery were extracted and the difference between creatinine values was calculated. Those patients with an increase of 0.3 mg/dl or 50% or more from baseline in the first 48 hours after surgery were considered to AKI, according to the Kidney Disease Improving Global Outcomes (KDIGO) Guidelines.<sup>6 7</sup> Cases without creatinine values but with an ICD-9/10 diagnostic code of AKI within seven days of surgery, but not thirty days prior, were also considered to have this outcome (eTable16). Finally, cases without data on serum creatinine or AKI administrative codes following surgery were considered free of this outcome on the premise that there was no clinically meaningful concern for kidney injury in such patients.

#### 4.2 Postoperative major adverse cardiovascular events (MACE)

Postoperative major adverse cardiovascular events were identified using ICD-9/10 diagnostic codes at both institutions, including myocardial infarction, cardiac arrest, and acute heart failure within 30 days after surgery, but not seven days prior to surgery. Cases without the described diagnostic codes were considered free of this outcome on the premise that there was no clinically meaningful concern for major adverse cardiovascular events in such patients.

#### 4.3 Postoperative stroke

Postoperative stroke was identified using ICD-9/10 diagnostic codes at both institutions, including stroke within thirty days after surgery, but not seven days prior to surgery. Cases without the described diagnostic codes were considered free of this outcome on the premise that there was no clinically meaningful concern for stroke in such patients.

#### 4.4 Postoperative reintubation

##### *Institution A*

Postoperative reintubation was identified using CPT codes of intubation events (CPT 31500, CPT 94002) within 7 days after the day of surgery.

##### *Institution B*

Postoperative reintubation was identified using data from the respiratory therapist database, while any ventilated patient in the hospital was recorded by this database. This variable definition has been used in previous studies and is therefore highly-validated.<sup>9</sup>

## 5 Mediation analysis

### 5.1 Potential impact of provider variability on the association between night surgery and transfusion rate

We tested whether variability across individual providers had an impact on the association between night surgery and the mediator transfusion rate. Therefore, we used a mixed-effects logistic regression analysis having individual anaesthesiologists as random effects and adding anaesthesia provider-related variables to the primary confounder model to account for the individual provider's experience level:

- overall number of anaesthesia cases (median number 423 [IQR 296 to 563]),
- number of anaesthesia cases per trimester (median number 54 [IQR 32 to 75])
- number of anaesthesia cases up to index surgery at the respective hospital (median number 189 [IQR 81 to 339])
- and the anaesthesia provider type (residents, certified registered nurse anaesthetists (CRNA), or attendings).

To designate the primary anaesthesia provider responsible for each case, we used the following definitions: The primary anaesthesia provider was the resident in resident plus attending-cases and the CRNA in CRNA plus attending-cases. In cases where two attendings delivered anaesthesia care, the primary provider was the attending who stayed the longest. If more than two providers were responsible for a case, the primary provider was the one who stayed longest, and if different provider types stayed equally long, the resident or CRNA was defined as primary provider. For this analysis, only providers who performed both day and night surgeries during the study period were included.



Similarly, we repeated this sensitivity analysis having individual surgeons as random effects and including indicators of the individual surgeon's experience level in the primary confounder model:

- overall number of surgeries (median number 1,130 [IQR 526 to 1,932])
- number of surgeries per trimester (median number 47 [IQR 27 to 69])
- and number of surgeries up to the index surgery (median number 427 [IQR 142 to 946])

Further important transfusion-associated factors such as estimated intraoperative blood loss and preoperative mild and moderate to severe anaemia within 30 days prior to surgery, respectively, were also added to the primary confounder model to analyse the association between transfusion rate and night surgery.

## Results

The observation of a higher risk of blood transfusion associated with night surgery remained robust when accounting for a potential variability in transfusion practice across individual anaesthesia providers ( $OR_{adj}$  1.19, 95% CI 1.10 to 1.30,  $p=0.005$ ;  $n=128,691$ ) and across individual surgeons ( $OR_{adj}$  1.35, 95% CI 1.21 to 1.51,  $p<0.001$ ,  $n=162,907$ ).

### 5.2 Case delay as potential mediator

To evaluate the role of case delay as potential mediator in the association between night surgery and 30-day mortality, we used path mediation analysis in a subgroup of sufficient data for case delays. Case delay was defined as difference between scheduled and actual start time in minutes in a subgroup with available data. First, we tested the hypothesis that case delays were higher during night cases than day cases. We used a multivariable-adjusted linear regression model on the association between night surgery and case delays that included all confounding variables of the primary analysis. Second, we used adjusted logistic regression analyses to examine whether case delay was associated with 30-day

mortality, indicating potential effect mediation. Conditional on an association between the mediator and 30-day mortality, we performed adjusted formal mediation analysis. We estimated odds ratios of the indirect (mediated) effect of case delay, and the total (unmediated) effect of night surgery on mortality, using bootstrapping with 1,000 replications. Percentage mediation by the mediators was calculated using the following equation:  $[\ln(\text{indirect effect}) / \ln(\text{total effect})] \times 100$ .

## Results

Data on case delay was available for 159,666 cases. The case delay time was longer in patients who underwent night surgery compared with day surgery (78 [SD 150] vs. 17 [SD 50] minutes,  $p < 0.001$ ). Night surgery was significantly associated with an increased case delay in adjusted linear regression analysis (Coef. 54.86, 95 % CI 53.35 to 56.37,  $p < 0.001$ ). Case delay was significantly associated with an increased risk of 30-day mortality ( $OR_{\text{adj}}$  1.001, 95% CI 1.000 to 1.001,  $p = 0.001$ ). Case delay was found to not mediate the effect of night surgery on mortality ( $p = 0.548$ ).

## 6 Sensitivity analyses

### 6.1 Robustness of the primary analysis to analytic approach

To account for potential bias originating from systematic differences between patients operated during the day versus night, we tested the robustness of the association between night surgery and 30-day mortality and morbidity in several analytic approaches. We performed propensity score-matched analysis based on the probability of 30-day mortality conditional on all confounding variables included in the primary model. Night versus day cases were matched on a 1:1 basis using a calliper of 0.1 without replacement. To determine the impact of provider variability on the association between night surgery and 30-day mortality, we used a multivariable-adjusted mixed-effects logistic regression model that included individual anaesthesia and surgical providers as random effects (eTable 2).

## Results

Propensity score matching and multivariable-adjusted mixed-effects logistic regression analysis confirmed our primary finding ( $OR_{adj}$  1.21, 95% CI 1.06 to 1.39,  $p=0.005$ ,  $n=41,414$ ;  $OR_{adj}$  1.34, 95% CI 1.18 to 1.52,  $n=289,480$  cases with anaesthesia provider and surgical provider data available).

### 6.2 Potential modification of the primary analysis by a one-year diagnosis of cancer

We tested whether the association between night surgery and 30-day mortality was modified by a recent diagnosis of cancer, including the interaction term “night surgery \* one-year diagnosis of cancer” in the multivariable-adjusted logistic regression model. We included both types of solid and non-solid cancer, which were defined by ICD-9/10 diagnostic codes (eTable 11).<sup>10</sup>

## Results

The primary association between 30-day mortality and night surgery was not modified by a recent diagnosis of cancer ( $p$ -for-interaction=0.2). Using linear combinations of the association between night surgery and 30-day mortality, and the interaction term, we confirmed the association of night surgery and 30-day mortality in subgroups of patients with or without a diagnosis of cancer (without cancer:  $OR_{adj}$  1.26, 95% CI 1.06 to 1.49,  $p=0.007$ ; with cancer:  $OR_{adj}$  1.46, 95% CI 1.24 to 1.71,  $p<0.001$ ).

### 6.3 Subgroup analyses

In subgroup analyses, we assessed whether the association between night surgery and 30-day mortality varied by patient population to ensure that the impact of night surgery on mortality was not driven by a narrow patient population. First, we excluded patients with an ASA status of more than 3 to further address that the effect may be driven by a more severe condition of patients undergoing night surgery. In addition, we performed analyses within

subgroups based on age (quartiles), work RVUs (quartiles), hospital networks (institution A versus B), cases managed by different anaesthesia provider types (residents, CRNAs, attendings), among general surgery patients and finally, in a subgroup including only the 50 most frequently performed surgeries ( $\geq 1,000$  cases within our cohort; CPT codes are provided in eTable 13), to have a more generalisable sample.

### *Results*

Results remained robust across subgroup analyses after excluding patients with an ASA status of more than 3 ( $OR_{adj}$  1.43, 95% CI 1.13 to 1.79,  $p=0.003$ ), in patients undergoing one of the 50 most frequently performed surgeries ( $OR_{adj}$  1.44, 95% CI 1.07 to 1.92,  $p=0.015$ ,  $n=119,796$ ), and across subgroups by age, surgical complexity, hospital networks, and the provider type that performed primary anaesthesia care (eTable 14). Among 54,615 patients undergoing general surgery, we found a 1.86 times higher adjusted odds ratio for 30-day mortality associated with night surgery (95% CI 1.31 to 2.65,  $p=0.001$ ).

#### **6.4 Sample size justification in a subgroup of emergency patients**

As described in the main manuscript, we examined the effect of night surgery in a subgroup of patients undergoing emergency surgery. Characteristics of emergency patients were compared between night and day surgeries (eTable 8). In order to ensure sufficient power for this subgroup analysis, we performed a power analysis based on the observed rates of night surgery and mortality within that cohort, assuming a two-sided alpha level of 0.05. In this subgroup, we achieved a power of 80 % to detect a clinically significant difference of 27 % between the groups.

## 6.5 Effect of specific time windows

Based on a recent study that investigated the effect of operation time on postoperative mortality and morbidity among non-emergency patients,<sup>11</sup> we performed analyses in specific time windows in this subgroup. 30-day mortality and morbidity were categorised by the time surgery started (eTable 12).

### Results

The risk of 30-day mortality was significantly higher for surgery start times between 3:00 and 10:59 pm than baseline risk during routine operating hours (7:00 to 11:59 am) (eFigure 2a). Similarly, the risk of 30-day morbidity increased when surgeries started between 4:00 pm and 6:59 am compared with baseline risk (eFigure 2b).

## 6.6 Effect of weekend surgery

To address that the effect of night surgery on mortality may partly be due to logistic processes and staffing, we investigated the effect of weekend surgery on mortality in the full cohort as well as in a subgroup of patients undergoing day surgery.

### Results

In this analysis, exposure to weekend surgery was not associated with 30-day mortality in the full cohort ( $p=0.867$ ) and in a subgroup of 283,260 patients undergoing day surgery ( $p=0.766$ ).

## 6.7 Analysis by year of surgery

We used a Poisson regression analysis correlating the number of patients who underwent night surgery with the respective year of surgery, while accounting for the logarithm of the total number of patients who underwent surgery during that year. To further examine

whether the effect changed over the study period, we included an interaction term between night surgery and the year of surgery in the primary model.

### *Results*

In the Poisson regression analysis, we found an incidence rate ratio of 1.01 (95% CI 1.01 to 1.02,  $p < 0.001$ ) per year. The analysis was performed in the years 2006 to 2017. Year of surgery did not modify the effect of night surgery on 30-day mortality ( $p$ -for-interaction=0.415).

## **6.8 Mortality starting three months after surgery**

We compared mortality risk after excluding the first three months after surgery from the logistic regression analysis.

### *Results*

Evaluation of mortality starting three months after surgery revealed no difference in mortality between patients undergoing day and night surgery ( $OR_{adj}$  0.98, 95% CI 0.91 to 1.05,  $p = 0.501$ ).

## **6.9 Additional confounding variables**

We added several confounding variables individually to the association between night surgery and 30-day mortality to evaluate the robustness of the effect with respect to variables not included in the primary analysis (eTable 15).

## **6.10 Varying definitions of night surgery**

We applied varying definitions of night surgery (5 pm to 9 pm and 9 pm to 6:59 am) to test the robustness of the effect on 30-day mortality varying by exposure classification.

Night surgery was associated with a higher risk of 30-day mortality across varying definitions of the exposure variable (5 pm to 9 pm:  $OR_{adj}$  1.33 95% CI 1.17 to 1.51  $p < 0.001$ ; 9 pm to 6:59 am:  $OR_{adj}$  1.32 95% CI 1.09 to 1.60,  $p = 0.005$ ).

## 7 Supplemental tables

### eTable 1. Definition of the secondary outcome

The definition of the secondary outcome 30-day morbidity was based on the International Classification of Diseases, Ninth and Tenth Revision (ICD-9 and ICD-10 codes).

| Types of complications         | ICD-10 diagnostic and procedure codes | ICD-9 diagnostic and procedure codes |
|--------------------------------|---------------------------------------|--------------------------------------|
| Atrial fibrillation or flutter | I4800                                 | 427.31                               |
|                                | I4801                                 | 427.32                               |
|                                | I481                                  |                                      |
|                                | I483                                  |                                      |
|                                | I484                                  |                                      |
|                                | I4890                                 |                                      |
|                                | I4891                                 |                                      |
| Acute renal failure            | N170                                  | 583.6                                |
|                                | N171                                  | 583.7                                |
|                                | N172                                  | 584.5                                |
|                                | N178                                  | 584.6                                |
|                                | N179                                  | 584.7                                |
|                                |                                       | 584.8                                |
|                                |                                       | 584.9                                |
| Bleeding                       | T810                                  | 998.1                                |
|                                | R58                                   | 459.0                                |
|                                |                                       | 99.07                                |
|                                |                                       | 99.03                                |



|                                             |       |        |
|---------------------------------------------|-------|--------|
| Cardiac arrest or life-threatening incident | R092  | 799.1  |
|                                             | I460  | V12.53 |
|                                             | I461  | 427.5  |
|                                             | I469  |        |
| Coma                                        | R4020 | 780.01 |
|                                             | R4029 |        |
| Deep venous thrombosis                      | I801  | 410.11 |
|                                             | I802  | 451.11 |
|                                             | I803  | 451.19 |
|                                             | I808  | 451.2  |
|                                             | I809  | 451.89 |
|                                             |       | 451.9  |
| Major disruption of wound                   | T813  | 998.30 |

|                                                     |       |        |
|-----------------------------------------------------|-------|--------|
| Myocardial infarction &<br>associated complications | I210  | 410    |
|                                                     | I211  | 429.5  |
|                                                     | I212  | 429.6  |
|                                                     | I213  | 429.71 |
|                                                     | I214  | 429.79 |
|                                                     | I2140 |        |
|                                                     | I2141 |        |
|                                                     | I2142 |        |
|                                                     | I2149 |        |
|                                                     | I219  |        |
|                                                     | I220  |        |
|                                                     | I221  |        |
|                                                     | I228  |        |
|                                                     | I229  |        |
|                                                     | I230  |        |
|                                                     | I231  |        |
|                                                     | I232  |        |
|                                                     | I233  |        |
|                                                     | I234  |        |
|                                                     | I235  |        |
|                                                     | I236  |        |
|                                                     | I2380 |        |
|                                                     | I2381 |        |
|                                                     | I2382 |        |
|                                                     | I2388 |        |
|                                                     | I2389 |        |

|                         |         |                              |
|-------------------------|---------|------------------------------|
| New-onset haemodialysis | 3E1M39Z | 38.95                        |
|                         |         | 39.27                        |
|                         |         | 39.95                        |
|                         |         | 54.98                        |
|                         |         | <b>Additional CPT codes:</b> |
|                         |         | 90935                        |
|                         |         | 90937                        |
|                         |         | 90945                        |
|                         |         | 90947                        |
|                         |         | 90966                        |
|                         |         | 90970                        |
|                         |         | 90999                        |
| Pneumonia               | J120    | 480                          |
|                         | J121    | 481                          |
|                         | J122    | 482                          |
|                         | J123    | 483                          |
|                         | J128    | 484                          |
|                         | J129    | 485                          |
|                         | J13     | 486                          |
|                         | J14     | 507                          |
|                         | J150    | 507.1                        |
|                         | J151    | 507.8                        |
|                         | J152    | 517.1                        |
|                         | J153    |                              |
|                         | J154    |                              |

|                    |      |     |
|--------------------|------|-----|
|                    | J155 |     |
|                    | J156 |     |
|                    | J157 |     |
|                    | J158 |     |
|                    | J159 |     |
|                    | J160 |     |
|                    | J168 |     |
|                    | J170 |     |
|                    | J171 |     |
|                    | J172 |     |
|                    | J173 |     |
|                    | J178 |     |
|                    | J180 |     |
|                    | J181 |     |
|                    | J182 |     |
|                    | J188 |     |
|                    | J189 |     |
|                    | J690 |     |
|                    | J691 |     |
|                    | J698 |     |
| Pulmonary embolism | I260 | 415 |
|                    | I269 |     |

|        |       |        |
|--------|-------|--------|
| Sepsis | A410  | 38.10  |
|        | A411  | 38.11  |
|        | A412  | 38.12  |
|        | A413  | 38.19  |
|        | A414  | 38.3   |
|        | A4150 | 38.40  |
|        | A4151 | 38.41  |
|        | A4152 | 38.42  |
|        | A4158 | 38.43  |
|        | A4159 | 38.49  |
|        | A4180 | 995.91 |
|        | A4188 |        |
|        | A419  |        |
| Shock  | R570  | 785.5  |
|        | R571  |        |
|        | R572  |        |
|        | R578  |        |
|        | R579  |        |
| Stroke |       | 362.31 |
|        | H341  | 362.34 |
|        | I630  | 430    |
|        | I631  | 431    |
|        | I632  | 433.91 |
|        | I634  | 434.01 |
|        | I635  | 434.11 |
|        | I636  | 434.91 |
|        |       | 435    |

|      |       |
|------|-------|
| I638 | 435.2 |
| I639 | 435.9 |
| I64  | 437.7 |
| I610 | V17.1 |
| I611 |       |
| I612 |       |
| I613 |       |
| I614 |       |
| I615 |       |
| I616 |       |
| I618 |       |
| I619 |       |
| I600 |       |
| I601 |       |
| I602 |       |
| I603 |       |
| I604 |       |
| I605 |       |
| I606 |       |
| I607 |       |
| I608 |       |
| I609 |       |
| G450 |       |
| G451 |       |
| G452 |       |
| G453 |       |

|                                                                                          |         |        |
|------------------------------------------------------------------------------------------|---------|--------|
|                                                                                          | G454    |        |
|                                                                                          | G458    |        |
|                                                                                          | G459    |        |
| Ventilator use for 48 hours or more                                                      | V46.11  | Z99.11 |
| Additional cardiac complications                                                         | I97.0   | 429.4  |
|                                                                                          | I97.11  |        |
|                                                                                          | I97.130 |        |
|                                                                                          | I97.190 |        |
| Functional digestive disorders                                                           | K91.1   | 564.2  |
|                                                                                          | K91.0   | 564.3  |
|                                                                                          | K91.89  | 564.4  |
| Haemorrhage, haematoma or inflammation complicating a procedure not elsewhere classified | D78.01  | 998.1  |
|                                                                                          | D78.02  | 998.11 |
|                                                                                          | D78.21  | 998.12 |
|                                                                                          | D78.22  | 998.13 |
|                                                                                          | D78.31  | 998.5  |
|                                                                                          | D78.32  | 998.51 |
|                                                                                          | D78.33  | 998.59 |
|                                                                                          | E36.01  |        |
|                                                                                          | E36.02  |        |
|                                                                                          | E89.821 |        |
|                                                                                          | E89.820 |        |
|                                                                                          | E89.810 |        |
|                                                                                          | E89.811 |        |

|  |         |  |
|--|---------|--|
|  | E89.822 |  |
|  | E89.823 |  |
|  | G97.31  |  |
|  | G97.32  |  |
|  | G97.51  |  |
|  | G97.52  |  |
|  | G97.61  |  |
|  | G97.62  |  |
|  | G97.63  |  |
|  | G97.64  |  |
|  | H59.111 |  |
|  | H59.112 |  |
|  | H59.113 |  |
|  | H59.119 |  |
|  | H59.121 |  |
|  | H59.122 |  |
|  | H59.123 |  |
|  | H59.129 |  |
|  | H59.311 |  |
|  | H59.312 |  |
|  | H59.313 |  |
|  | H59.319 |  |
|  | H59.321 |  |
|  | H59.322 |  |
|  | H59.323 |  |
|  | H59.329 |  |



|  |         |  |
|--|---------|--|
|  | H59.331 |  |
|  | H59.332 |  |
|  | H59.333 |  |
|  | H59.339 |  |
|  | H59.341 |  |
|  | H59.342 |  |
|  | H59.343 |  |
|  | H59.349 |  |
|  | H59.351 |  |
|  | H59.352 |  |
|  | H59.353 |  |
|  | H59.359 |  |
|  | H59.361 |  |
|  | H59.362 |  |
|  | H59.363 |  |
|  | H59.369 |  |
|  | H95.21  |  |
|  | H95.22  |  |
|  | H95.51  |  |
|  | H95.52  |  |
|  | H95.53  |  |
|  | H95.54  |  |
|  | H95.41  |  |
|  | H95.42  |  |
|  | I97.410 |  |
|  | I97.411 |  |

|  |         |  |
|--|---------|--|
|  | I97.418 |  |
|  | I97.42  |  |
|  | I97.610 |  |
|  | I97.611 |  |
|  | I97.618 |  |
|  | I97.620 |  |
|  | I97.621 |  |
|  | I97.622 |  |
|  | I97.630 |  |
|  | I97.631 |  |
|  | I97.638 |  |
|  | I97.640 |  |
|  | I97.641 |  |
|  | I97.648 |  |
|  | J95.61  |  |
|  | J95.62  |  |
|  | J95.830 |  |
|  | J95.831 |  |
|  | J95.860 |  |
|  | J95.861 |  |
|  | J95.863 |  |
|  | K91.61  |  |
|  | K91.62  |  |
|  | K91.840 |  |
|  | K91.841 |  |
|  | K91.870 |  |

|  |          |  |
|--|----------|--|
|  | K91.871  |  |
|  | K91.872  |  |
|  | K91.873  |  |
|  | L76.01   |  |
|  | L76.02   |  |
|  | L76.31   |  |
|  | L76.32   |  |
|  | L76.33   |  |
|  | L76.34   |  |
|  | L76.21   |  |
|  | L76.22   |  |
|  | M96.810  |  |
|  | M96.811  |  |
|  | M96.830  |  |
|  | M96.840  |  |
|  | M96.841  |  |
|  | M99.842  |  |
|  | M99.843  |  |
|  | M96.831  |  |
|  | N99.61   |  |
|  | N99.62   |  |
|  | N99.820  |  |
|  | N99.821  |  |
|  | N99.840  |  |
|  | N99.841  |  |
|  | T88.8XXA |  |

|                                                                                                 |          |        |
|-------------------------------------------------------------------------------------------------|----------|--------|
|                                                                                                 | K68.11   |        |
| Hypotension                                                                                     | I95.3    | 458.21 |
|                                                                                                 | I95.2    | 458.29 |
|                                                                                                 | I95.81   |        |
| Infection of tracheostomy                                                                       | J95.02   | 519.01 |
| Infection of gastrostomy                                                                        | K94.22   | 536.41 |
| Infection of oesophagostomy                                                                     | K94.32   | 530.86 |
| Intestinal complications                                                                        | K91.850  | 569.6  |
|                                                                                                 | K91.858  | 569.71 |
|                                                                                                 | K62.5    | 569.79 |
|                                                                                                 |          | 579.3  |
| Other cardiac, urinary,<br>respiratory or digestive<br>complications not elsewhere<br>specified | I97.710  | 997.1  |
|                                                                                                 | I97.790  | 997.3  |
|                                                                                                 | I97.88   | 997.31 |
|                                                                                                 | I97.89   | 997.39 |
|                                                                                                 | J95.851  | 997.4  |
|                                                                                                 | J95.859  | 997.5  |
|                                                                                                 | J95.88   | 997.62 |
|                                                                                                 | J95.89   |        |
|                                                                                                 | N99.89   |        |
|                                                                                                 | T87.40   |        |
| Other infection due to medical<br>care not elsewhere classified                                 | T80.219A | 999.3  |

**eTable 2. Confounding variables**

The primary confounder model included a large number of variables (fixed effects). As sensitivity analysis, we used mixed-effects logistic regression by including the random effects of 1,478 anaesthesia and 1,190 surgical providers in the model.

| Fixed effects                                                                                                                                                                                                                                                                                                                                                                             |  | Random effects                  |  |
|-------------------------------------------------------------------------------------------------------------------------------------------------------------------------------------------------------------------------------------------------------------------------------------------------------------------------------------------------------------------------------------------|--|---------------------------------|--|
| Patient-related characteristics                                                                                                                                                                                                                                                                                                                                                           |  | Individual provider             |  |
| Age [y], quintiles<br>Sex<br>BMI [kg/m <sup>2</sup> ], categorical<br>ASA physical status, categorical<br>CCI, categorical<br>History of chronic obstructive pulmonary disease, binary<br>History of chronic heart failure, binary<br>History of coronary artery disease, binary<br>History of malignant disease, binary<br>Stroke 1 year prior to surgery, binary<br>Home oxygen therapy |  | Anaesthesia provider<br>Surgeon |  |
| Procedure-related characteristics                                                                                                                                                                                                                                                                                                                                                         |  | +                               |  |
| Duration of surgery [min], quintiles<br>Date of surgery, quintiles<br>Surgery type, categorical<br>Surgical setting, categorical<br>Emergency surgery, binary<br>Work RVUs, quintiles<br>Hospital network (institution A versus B)                                                                                                                                                        |  |                                 |  |
| Anaesthesia-related characteristics                                                                                                                                                                                                                                                                                                                                                       |  |                                 |  |
| Intraoperative hypotensive minutes [MAP <55 mmHg], quintiles<br>Units of packed red blood cells (0, 1, 2, ≥3 units)<br>Intraoperative dose of vasopressors [mg], quintiles<br>SpO2/FiO2 ratio, quintiles<br>Handover of anaesthesia care, binary                                                                                                                                          |  |                                 |  |
| <b>Abbreviations:</b> ASA, American Society of Anaesthesiologists Physical Status Classification System; BMI, body mass index; CCI, Charlson Comorbidity Index; MAP, mean arterial pressure; RVUs, relative value units.                                                                                                                                                                  |  |                                 |  |

**eTable 3. Comorbidities within one year prior to surgery among patients undergoing day surgery versus night surgery in the primary imputed cohort**

| Patient comorbidities, n (%)                    | Day surgery<br>n = 322,327 | Night surgery<br>n = 27,908 | Standardised<br>difference |
|-------------------------------------------------|----------------------------|-----------------------------|----------------------------|
| Coronary artery disease                         | 33,938 (10.5%)             | 3,724 (13.3%)               | -0.087                     |
| Myocardial infarction                           | 13,732 (4.3%)              | 1,657 (5.9%)                | -0.076                     |
| Heart failure                                   | 20,662 (6.4%)              | 2,960 (10.6%)               | -0.151                     |
| Ischemic stroke                                 | 5,585 (1.73%)              | 816 (2.92%)                 | -0.079                     |
| Cerebrovascular disease                         | 21,195 (6.6%)              | 2,702 (9.7%)                | -0.114                     |
| Peripheral vascular disease                     | 25,549 (7.9%)              | 3,173 (11.4%)               | -0.117                     |
| Diabetes mellitus with chronic complications    | 14,306 (4.4%)              | 1,789 (6.4%)                | -0.087                     |
| Diabetes mellitus without chronic complications | 46,742 (14.5%)             | 4,739 (17.0%)               | -0.068                     |
| Renal disease                                   | 22,454 (7.0%)              | 3,016 (10.8%)               | -0.135                     |
| Moderate to severe liver disease                | 3,076 (1.0%)               | 666 (2.4%)                  | -0.112                     |
| Chronic obstructive pulmonary disease           | 56,249 (17.5%)             | 5,081 (18.2%)               | -0.020                     |
| Malignant disease (with or without metastasis)  | 92,546 (28.7%)             | 5,644 (20.2%)               | 0.198                      |
| Peptic ulcer disease                            | 3,864 (1.2%)               | 649 (2.3%)                  | -0.086                     |
| Dementia                                        | 2,181 (0.7%)               | 384 (1.4%)                  | -0.069                     |
| Hemiplegia                                      | 5,515 (1.7%)               | 1,012 (3.6%)                | -0.119                     |
| HIV infection                                   | 2,855 (0.9%)               | 299 (1.1%)                  | -0.019                     |

31

|                     |              |            |        |
|---------------------|--------------|------------|--------|
| CCI, median (IQR)   | 1 (0, 3)     | 1 (0, 3)   | -0.071 |
| Home oxygen therapy | 2,287 (0.7%) | 260 (0.9%) | -0.025 |

**eTable 4. Surgical services among patients undergoing day surgery versus night surgery in the primary imputed cohort**

The surgical service was included as a categorical variable in the primary confounder model with a standardised difference of 0.168 between patients undergoing day versus night surgery. Characteristics and distribution of variables by day versus night surgery are presented for cases with observed data.

| Surgical service, n (%)                   | Day surgery<br>n = 322,327 | Night surgery<br>n = 27,908 |
|-------------------------------------------|----------------------------|-----------------------------|
| Non-operating room anaesthesia            | 5,952 (1.9%)               | 276 (1.0%)                  |
| Burn surgery                              | 1,942 (0.6%)               | 65 (0.2%)                   |
| Acute care surgery                        | 8,606 (2.7%)               | 3,819 (13.7%)               |
| General surgery                           | 54,667 (17.0%)             | 5,092 (18.3%)               |
| Gynaecology                               | 31,607 (9.8%)              | 2,040 (7.3%)                |
| Neurosurgery                              | 21,177 (6.6%)              | 2,521 (9.0%)                |
| Oral/Maxillofacial surgery/Otolaryngology | 3,488 (1.1%)               | 90 (0.3%)                   |
| Orthopedic surgery                        | 76,262 (23.7%)             | 5,492 (19.7%)               |
| Other                                     | 3,800 (1.2%)               | 416 (1.5%)                  |
| Plastic surgery                           | 8,963 (2.8%)               | 525 (1.9%)                  |
| Radiology                                 | 730 (0.2%)                 | 92 (0.3%)                   |
| Surgical oncology                         | 21,354 (6.6%)              | 1,424 (5.1%)                |
| Thoracic surgery                          | 1,413 (0.4%)               | 147 (0.5%)                  |
| Transplant surgery                        | 14,674 (4.6%)              | 391 (1.4%)                  |
| Urology                                   | 21,412 (6.6%)              | 1,467 (5.3%)                |

|                  |              |              |
|------------------|--------------|--------------|
| Vascular surgery | 6,161 (1.9%) | 1,089 (3.9%) |
|------------------|--------------|--------------|

**eTable 5. Characteristics and distribution of variables by day versus night surgery in the complete-case cohort**

| Patient characteristics                                    | Day surgery       | Night surgery     |
|------------------------------------------------------------|-------------------|-------------------|
|                                                            | n = 283,185       | n = 20,707        |
| Sex, male, n (%)                                           | 123,530 (43.6%)   | 10,270 (49.6%)    |
| Age (years), mean $\pm$ SD                                 | 53.98 $\pm$ 16.38 | 51.96 $\pm$ 18.65 |
| BMI (kg/m <sup>2</sup> ), mean $\pm$ SD                    | 28.36 $\pm$ 6.86  | 27.79 $\pm$ 6.89  |
| ASA status, median (IQR)                                   | 2 (2, 3)          | 2 (2, 3)          |
| ASA $\geq$ 3, n (%)                                        | 90,415 (31.9%)    | 8,676 (41.9%)     |
| Admission type, n (%)                                      |                   |                   |
| Ambulatory                                                 | 107,409 (37.9%)   | 3,002 (14.5%)     |
| Same day admission                                         | 133,359 (47.1%)   | 9,753 (47.1%)     |
| Inpatient                                                  | 42,417 (15.0%)    | 7,952 (38.4%)     |
| <b>Comorbidities within 1 year prior to surgery, n (%)</b> |                   |                   |
| Coronary artery disease                                    | 28,579 (10.1%)    | 2,505 (12.1%)     |
| Myocardial infarction                                      | 11,202 (4.0%)     | 1,099 (5.3%)      |
| Heart failure                                              | 16,894 (6.0%)     | 2,018 (9.7%)      |
| Ischemic stroke                                            | 4,719 (1.7%)      | 531 (2.6%)        |
| Cerebrovascular disease                                    | 18,124 (6.4%)     | 1,854 (9.0%)      |
| Peripheral vascular disease                                | 21,012 (7.4%)     | 2,210 (10.7%)     |
| Diabetes mellitus with chronic complications               | 11,465 (4.0%)     | 1,228 (5.9%)      |
| Diabetes mellitus without chronic complications            | 39,427 (13.9%)    | 3,270 (15.8%)     |
| Renal disease                                              | 18,671 (6.6%)     | 2,117 (10.2%)     |



|                                                                                     |                         |                         |
|-------------------------------------------------------------------------------------|-------------------------|-------------------------|
| Moderate to severe liver disease                                                    | 2,460 (0.9%)            | 441 (2.1%)              |
| Chronic obstructive pulmonary disease                                               | 48,581 (17.2%)          | 3,644 (17.6%)           |
| Malignant disease (with or without metastasis)                                      | 84,716 (29.9%)          | 4,485 (21.7%)           |
| Peptic ulcer disease                                                                | 3,279 (1.2%)            | 446 (2.2%)              |
| Dementia                                                                            | 1,699 (0.6%)            | 246 (1.2%)              |
| Hemiplegia                                                                          | 4,657 (1.6%)            | 688 (3.3%)              |
| HIV infection                                                                       | 2,382 (0.8%)            | 222 (1.1%)              |
| CCI, median (IQR)                                                                   | 1 (0, 3)                | 1 (0, 3)                |
| Home oxygen therapy                                                                 | 1,803 (0.6%)            | 168 (0.8%)              |
| <b>Intraoperative data</b>                                                          |                         |                         |
| Duration of surgery (min), median (IQR)                                             | 133.00 (86.00, 207.00)  | 113.00 (80.00, 164.00)  |
| Handover of anaesthesia care, n (%)                                                 | 24,949 (8.8%)           | 4,686 (22.6%)           |
| Intraoperative hypotensive minutes of MAP <55mmHg, median (IQR)                     | 0.00 (0.00, 2.00)       | 0.00 (0.00, 1.00)       |
| Emergency surgery, n (%)                                                            | 6,404 (2.3%)            | 7,162 (34.6%)           |
| Work RVUs, median (IQR)                                                             | 13.18 (7.38, 19.91)     | 10.62 (7.08, 17.63)     |
| Packed red blood cell units transfused intraoperatively, n (%)                      |                         |                         |
| 0 units                                                                             | 275,303 (97.2%)         | 19,558 (94.5%)          |
| 1 unit                                                                              | 3,433 (1.2%)            | 469 (2.3%)              |
| 2 units                                                                             | 2,852 (1.0%)            | 373 (1.8%)              |
| ≥ 3 units                                                                           | 1,597 (0.6%)            | 307 (1.5%)              |
| Total intraoperative vasopressor dose, norepinephrine equivalent (mg), median (IQR) | 0.01 (0.00, 0.11)       | 0.00 (0.00, 0.11)       |
| Median SpO <sub>2</sub> /FiO <sub>2</sub> ratio, median (IQR)                       | 183.33 (161.29, 220.22) | 178.57 (152.31, 206.56) |

|                                                                                                                                                                                                                                                                           |                 |                |
|---------------------------------------------------------------------------------------------------------------------------------------------------------------------------------------------------------------------------------------------------------------------------|-----------------|----------------|
| <b>Surgical service, n (%)</b>                                                                                                                                                                                                                                            |                 |                |
| Non-operating room anaesthesia                                                                                                                                                                                                                                            | 5,549 (2.0%)    | 244 (1.2%)     |
| Burn surgery                                                                                                                                                                                                                                                              | 1,754 (0.6%)    | 59 (0.3%)      |
| Acute care surgery                                                                                                                                                                                                                                                        | 7,365 (2.6%)    | 3,069 (14.8%)  |
| General surgery                                                                                                                                                                                                                                                           | 50,982 (18.0%)  | 3,633 (17.5%)  |
| Gynaecology                                                                                                                                                                                                                                                               | 29,245 (10.3%)  | 1,742 (8.4%)   |
| Neurosurgery                                                                                                                                                                                                                                                              | 19,338 (6.8%)   | 1,806 (8.7%)   |
| Oral/Maxillofacial surgery/Otolaryngology                                                                                                                                                                                                                                 | 3,085 (1.1%)    | 83 (0.4%)      |
| Orthopedic surgery                                                                                                                                                                                                                                                        | 63,206 (22.3%)  | 3,936 (19.0%)  |
| Other                                                                                                                                                                                                                                                                     | 3,067 (1.1%)    | 318 (1.5%)     |
| Plastic surgery                                                                                                                                                                                                                                                           | 7,808 (2.8%)    | 354 (1.7%)     |
| Radiology                                                                                                                                                                                                                                                                 | 643 (0.2%)      | 77 (0.4%)      |
| Surgical oncology                                                                                                                                                                                                                                                         | 18,478 (6.5%)   | 1,005 (4.9%)   |
| Thoracic surgery                                                                                                                                                                                                                                                          | 1,297 (0.5%)    | 145 (0.7%)     |
| Transplant surgery                                                                                                                                                                                                                                                        | 13,893 (4.9%)   | 355 (1.7%)     |
| Urology                                                                                                                                                                                                                                                                   | 18,007 (6.4%)   | 991 (4.8%)     |
| Vascular surgery                                                                                                                                                                                                                                                          | 4,909 (1.7%)    | 757 (3.7%)     |
| Hospital network (institution A vs. B), n (%)                                                                                                                                                                                                                             | 148,703 (52.5%) | 11,329 (54.7%) |
| 30-day mortality                                                                                                                                                                                                                                                          | 1,769 (0.6%)    | 465 (2.3%)     |
| 30-day morbidity                                                                                                                                                                                                                                                          | 22,919 (8.1%)   | 2,723 (13.2%)  |
| <b>Abbreviations:</b> ASA, American Society of Anesthesiologists Physical Status Classification System; BMI, body mass index; CCI, Charlson Comorbidity Index; IQR, interquartile range; MAP, mean arterial pressure; SD, standard deviation, RVUs, relative value units. |                 |                |

**eTable 6. Characteristics and distribution of variables by patients who underwent ambulatory/same-day surgery versus inpatient surgery**

Normally distributed continuous variables were expressed as mean ( $\pm$  SD), non-normally distributed variables as median (IQR), and categorical variables as frequency (percentages).

| Patient characteristics                                    | Ambulatory/same-day surgery | Inpatient surgery |
|------------------------------------------------------------|-----------------------------|-------------------|
|                                                            | n = 253,523                 | n = 50,369        |
| Night surgery, n (%)                                       | 12,755 (5.0%)               | 7,952 (15.8%)     |
| Sex, male, n (%)                                           | 108,163 (42.7%)             | 25,637 (50.9%)    |
| Age (years), mean $\pm$ SD                                 | 53.06 $\pm$ 16.09           | 57.80 $\pm$ 18.21 |
| BMI (kg/m <sup>2</sup> ), mean $\pm$ SD                    | 28.42 $\pm$ 6.81            | 27.82 $\pm$ 7.12  |
| ASA $\geq$ 3, n (%)                                        | 69,447 (27.4%)              | 29,644 (58.9%)    |
| <b>Comorbidities within 1 year prior to surgery, n (%)</b> |                             |                   |
| Coronary artery disease                                    | 21,766 (8.6%)               | 9,318 (18.5%)     |
| Myocardial infarction                                      | 8,132 (3.2%)                | 4,169 (8.3%)      |
| Heart failure                                              | 10,770 (4.2%)               | 8,142 (16.2%)     |
| Ischemic stroke                                            | 2,714 (1.1%)                | 2,536 (5.0%)      |
| Cerebrovascular disease                                    | 12,372 (4.9%)               | 7,606 (15.1%)     |
| Peripheral vascular disease                                | 14,597 (5.8%)               | 8,625 (17.1%)     |
| Diabetes mellitus with chronic complications               | 8,159 (3.2%)                | 4,534 (9.0%)      |
| Diabetes mellitus without chronic complications            | 31,924 (12.6%)              | 10,773 (21.4%)    |
| Renal disease                                              | 13,125 (5.2%)               | 7,663 (15.2%)     |
| Moderate to severe liver disease                           | 1,625 (0.6%)                | 1,276 (2.5%)      |
| Chronic obstructive pulmonary disease                      | 41,008 (16.2%)              | 11,217 (22.3%)    |
| Malignant disease (with or without metastasis)             | 76,379 (30.1%)              | 13,881 (27.6%)    |
| Peptic ulcer disease                                       | 2,404 (0.9%)                | 1,321 (2.6%)      |
| Dementia                                                   | 920 (0.4%)                  | 1,025 (2.0%)      |
| Hemiplegia                                                 | 2,651 (1.0%)                | 2,694 (5.3%)      |
| HIV infection                                              | 1,956 (0.8%)                | 648 (1.3%)        |
| CCI, median (IQR)                                          | 1 (0, 2)                    | 2 (0, 5)          |
| Home oxygen therapy                                        | 1,307 (0.5%)                | 664 (1.3%)        |
| <b>Intraoperative data</b>                                 |                             |                   |
| Duration of surgery (min), median (IQR)                    | 131 (85, 205)               | 133 (89, 202)     |
| Handover of anaesthesia care, n (%)                        | 9,936 (8.6%)                | 3,665 (12.8%)     |
| Intraoperative hypotensive minutes of MAP                  | 0.00 (0.00, 2.00)           | 1.00 (0.00, 3.00) |

|                                                                                     |                         |                         |
|-------------------------------------------------------------------------------------|-------------------------|-------------------------|
| <55mmHg, median (IQR)                                                               |                         |                         |
| Emergency surgery, n (%)                                                            | 7,723 (3.0%)            | 5,843 (11.6%)           |
| Work RVUs, median (IQR)                                                             | 12.80 (7.38, 19.61)     | 13.22 (7.38, 19.66)     |
| Packed red blood cell units transfused intraoperatively, n (%)                      |                         |                         |
| 0 units                                                                             | 249,233 (98.3%)         | 45,628 (90.6%)          |
| 1 unit                                                                              | 1,733 (0.7%)            | 2,169 (4.3%)            |
| 2 units                                                                             | 1,573 (0.6%)            | 1,652 (3.3%)            |
| ≥ 3 units                                                                           | 984 (0.4%)              | 920 (1.8%)              |
| Total intraoperative vasopressor dose, norepinephrine equivalent (mg), median (IQR) | 0.00 (0.00, 0.08)       | 0.04 (0.00, 0.25)       |
| Median SpO <sub>2</sub> /FiO <sub>2</sub> ratio, median (IQR)                       | 183.33 (161.90, 220.00) | 180.33 (151.15, 217.07) |
| <b>Surgical service, n (%)</b>                                                      |                         |                         |
| Non-operating room anaesthesia                                                      | 4,740 (1.9%)            | 1,053 (2.1%)            |
| Burn surgery                                                                        | 667 (0.3%)              | 1,146 (2.3%)            |
| Emergency surgical service                                                          | 5,148 (2.0%)            | 5,286 (10.5%)           |
| General surgery                                                                     | 49,163 (19.4%)          | 5,452 (10.8%)           |
| Gynaecology                                                                         | 29,526 (11.6%)          | 1,461 (2.9%)            |
| Neurosurgery                                                                        | 15,232 (6.0%)           | 5,912 (11.7%)           |
| Oral/Maxillofacial surgery                                                          | 2,866 (1.1%)            | 302 (0.6%)              |
| Orthopedic surgery                                                                  | 53,605 (21.1%)          | 13,537 (26.9%)          |
| Other                                                                               | 2,122 (0.8%)            | 1,263 (2.5%)            |
| Otolaryngology                                                                      | 7,638 (3.0%)            | 524 (1.0%)              |
| Paediatric surgery                                                                  | 544 (0.2%)              | 176 (0.3%)              |
| Plastic surgery                                                                     | 17,783 (7.0%)           | 1,700 (3.4%)            |
| Radiology                                                                           | 858 (0.3%)              | 584 (1.2%)              |
| Surgical oncology                                                                   | 13,633 (5.4%)           | 615 (1.2%)              |
| Thoracic surgery                                                                    | 15,469 (6.1%)           | 3,529 (7.0%)            |
| Transplant surgery                                                                  | 4,407 (1.7%)            | 1,259 (2.5%)            |
| Urology                                                                             | 23,586 (9.3%)           | 2,083 (4.1%)            |
| Vascular surgery                                                                    | 6,536 (2.6%)            | 4,487 (8.9%)            |
| Hospital network (institution A vs. B), n (%)                                       | 115,196 (45.4%)         | 28,664 (56.9%)          |
| <b>Study outcomes, n (%)</b>                                                        |                         |                         |
| 30-day mortality                                                                    | 632 (0.3%)              | 1,602 (3.2%)            |

|                  |               |              |
|------------------|---------------|--------------|
| 30-day morbidity | 21,612 (8.5%) | 4,030 (8.0%) |
|------------------|---------------|--------------|

**eTable 7. Characteristics and distribution of variables by day versus night surgery in a sub cohort of patients undergoing ambulatory/same-day surgery.**

Normally distributed continuous variables were expressed as mean ( $\pm$  SD), non-normally distributed variables as median (IQR), and categorical variables as frequency (percentages).

| Patient characteristics                                    | Day surgery<br>n = 240,768 | Night surgery<br>n = 12,755 |
|------------------------------------------------------------|----------------------------|-----------------------------|
| Sex, male, n (%)                                           | 10,1917 (42.33%)           | 6,246 (48.97%)              |
| Age (years), mean $\pm$ SD                                 | 52.24 $\pm$ 15.95          | 49.72 $\pm$ 18.17           |
| BMI (kg/m <sup>2</sup> ), mean $\pm$ SD                    | 28.45 $\pm$ 6.81           | 27.86 $\pm$ 6.71            |
| ASA $\geq$ 3, n (%)                                        | 65,419 (27.17%)            | 4,028 (31.58%)              |
| Admission type, n (%)                                      |                            |                             |
| Ambulatory                                                 | 107,409 (44.6%)            | 3,002 (23.5%)               |
| Same day admission                                         | 133,359 (55.4%)            | 9,753 (76.5%)               |
| <b>Comorbidities within 1 year prior to surgery, n (%)</b> |                            |                             |
| Coronary artery disease                                    | 20,614 (8.6%)              | 1,152 (9.0%)                |
| Myocardial infarction                                      | 7,645 (3.2%)               | 487 (3.8%)                  |
| Heart failure                                              | 10,009 (4.2%)              | 761 (6.0%)                  |
| Ischemic stroke                                            | 2,549 (1.1%)               | 165 (1.3%)                  |
| Cerebrovascular disease                                    | 11,631 (4.8%)              | 741 (5.8%)                  |
| Peripheral vascular disease                                | 13,644 (5.7%)              | 953 (7.5%)                  |
| Diabetes mellitus with chronic complications               | 7,634 (3.2%)               | 525 (4.1%)                  |
| Diabetes mellitus without chronic complications            | 30,270 (12.6%)             | 1,654 (13.0%)               |
| Renal disease                                              | 12,195 (5.1%)              | 930 (7.3%)                  |

|                                                                                     |                         |                         |
|-------------------------------------------------------------------------------------|-------------------------|-------------------------|
| Moderate to severe liver disease                                                    | 1,435 (0.6%)            | 190 (1.5%)              |
| Chronic obstructive pulmonary disease                                               | 39,078 (16.2%)          | 1,930 (15.1%)           |
| Malignant disease (with or without metastasis)                                      | 19,589 (8.1%)           | 841 (6.6%)              |
| Peptic ulcer disease                                                                | 2,183 (0.9%)            | 221 (1.7%)              |
| Dementia                                                                            | 828 (0.3%)              | 92 (0.7%)               |
| Hemiplegia                                                                          | 2,390 (1.0%)            | 261 (2.1%)              |
| HIV infection                                                                       | 1,821 (0.8%)            | 135 (1.1%)              |
| CCI median, (IQR)                                                                   | 1 (0, 2)                | 1 (0, 2)                |
| Home oxygen therapy                                                                 | 1,231 (0.5%)            | 76 (0.6%)               |
| <b>Intraoperative data</b>                                                          |                         |                         |
| Duration of surgery (min), median (IQR)                                             | 133.00 (85.00, 207.00)  | 110.00 (78.00, 159.00)  |
| Handover of anaesthesia care, n (%)                                                 | 19,911 (8.3%)           | 2,953 (23.2%)           |
| Intraoperative hypotensive minutes of MAP <55mmHg, median (IQR)                     | 0.00 (0.00, 2.00)       | 0.00 (0.00, 2.00)       |
| Emergency surgery, n (%)                                                            | 2,966 (1.2%)            | 4,757 (37.3%)           |
| Work RVUs, median (IQR)                                                             | 13.18 (7.38, 19.94)     | 10.47 (7.07, 16.47)     |
| Packed red blood cell units transfused intraoperatively, n (%)                      |                         |                         |
| 0 units                                                                             | 236,926 (98.4%)         | 12,307 (96.5%)          |
| 1 unit                                                                              | 1,556 (0.6%)            | 177 (1.4%)              |
| 2 units                                                                             | 1,426 (0.6%)            | 147 (1.1%)              |
| ≥ 3 units                                                                           | 860 (0.4%)              | 124 (1.0%)              |
| Total intraoperative vasopressor dose, norepinephrine equivalent (mg), median (IQR) | 0.00 (0.00, 0.08)       | 0.00 (0.00, 0.08)       |
| Median SpO <sub>2</sub> /FiO <sub>2</sub> ratio, median (IQR)                       | 183.49 (161.30, 220.45) | 180.00 (156.35, 208.33) |

|                                                                                                                                                                                                                                                                           |                 |               |
|---------------------------------------------------------------------------------------------------------------------------------------------------------------------------------------------------------------------------------------------------------------------------|-----------------|---------------|
| <b>Surgical service, n (%)</b>                                                                                                                                                                                                                                            |                 |               |
| Non-operating room anaesthesia                                                                                                                                                                                                                                            | 4,600 (1.9%)    | 140 (1.1%)    |
| Burn surgery                                                                                                                                                                                                                                                              | 650 (0.3%)      | 17 (0.1%)     |
| Acute care surgery                                                                                                                                                                                                                                                        | 1,371 (0.6%)    | 785 (6.2%)    |
| General surgery                                                                                                                                                                                                                                                           | 46,817 (19.4%)  | 2,346 (18.4%) |
| Gynaecology                                                                                                                                                                                                                                                               | 28,116 (11.7%)  | 1410 (11.1%)  |
| Neurosurgery                                                                                                                                                                                                                                                              | 14,378 (6.0%)   | 854 (6.7%)    |
| Oral/Maxillofacial surgery/Otolaryngology                                                                                                                                                                                                                                 | 3,716 (1.5%)    | 66 (0.5%)     |
| Orthopedic surgery                                                                                                                                                                                                                                                        | 51,105 (21.2%)  | 2,500 (19.6%) |
| Other                                                                                                                                                                                                                                                                     | 10,940 (4.5%)   | 1,440 (11.3%) |
| Plastic surgery                                                                                                                                                                                                                                                           | 17,105 (7.1%)   | 678 (5.3%)    |
| Radiology                                                                                                                                                                                                                                                                 | 805 (0.3%)      | 53 (0.4%)     |
| Surgical oncology                                                                                                                                                                                                                                                         | 13,361 (5.6%)   | 272 (2.1%)    |
| Thoracic surgery                                                                                                                                                                                                                                                          | 14,976 (6.2%)   | 493 (3.9%)    |
| Transplant surgery                                                                                                                                                                                                                                                        | 3,951 (1.6%)    | 456 (3.6%)    |
| Urology                                                                                                                                                                                                                                                                   | 22,737 (9.4%)   | 849 (6.7%)    |
| Vascular surgery                                                                                                                                                                                                                                                          | 6140 (2.6%)     | 396 (3.1%)    |
| Hospital network (institution A vs. B), n (%)                                                                                                                                                                                                                             | 109,621 (45.5%) | 5,575 (43.7%) |
| <b>Study outcomes, n (%)</b>                                                                                                                                                                                                                                              |                 |               |
| 30-day mortality                                                                                                                                                                                                                                                          | 497 (0.2%)      | 135 (1.1%)    |
| 30-day morbidity                                                                                                                                                                                                                                                          | 19,535 (8.1%)   | 2,077 (16.3%) |
| <b>Abbreviations:</b> ASA, American Society of Anesthesiologists Physical Status Classification System; BMI, body mass index; CCI, Charlson Comorbidity Index; IQR, interquartile range; MAP, mean arterial pressure; SD, standard deviation, RVUs, relative value units. |                 |               |

**eTable 8. Characteristics and distribution of variables among emergency cases**

Normally distributed continuous variables were expressed as mean ( $\pm$  SD), non-normally distributed variables as median (IQR), and categorical variables as frequency (percentages).

| Patient characteristics                                    | Day surgery<br>n = 6,404 | Night surgery<br>n = 7,162 |
|------------------------------------------------------------|--------------------------|----------------------------|
| Sex, male, n (%)                                           | 3,217 (50.2%)            | 3,676 (51.3%)              |
| Age (years), mean $\pm$ SD                                 | 52.82 $\pm$ 20.07        | 49.32 $\pm$ 19.79          |
| BMI (kg/m <sup>2</sup> ), mean $\pm$ SD                    | 27.59 $\pm$ 6.81         | 27.41 $\pm$ 6.78           |
| ASA $\geq$ 3, n (%)                                        | 3,024 (47.2%)            | 2,808 (39.2%)              |
| Admission type, n (%)                                      |                          |                            |
| Ambulatory                                                 | 440 (6.9%)               | 531 (7.4%)                 |
| Same day admission                                         | 2,526 (39.4%)            | 4,226 (59.0%)              |
| Inpatient                                                  | 3,438 (53.7%)            | 2,405 (33.6%)              |
| <b>Comorbidities within 1 year prior to surgery, n (%)</b> |                          |                            |
| Coronary artery disease                                    | 914 (14.3%)              | 798 (11.1%)                |
| Myocardial infarction                                      | 399 (6.2%)               | 363 (5.1%)                 |
| Heart failure                                              | 734 (11.5%)              | 686 (9.6%)                 |
| Ischemic stroke                                            | 223 (3.5%)               | 143 (2.0%)                 |
| Cerebrovascular disease                                    | 764 (11.9%)              | 587 (8.2%)                 |
| Peripheral vascular disease                                | 820 (12.8%)              | 764 (10.7%)                |
| Diabetes mellitus with chronic complications               | 368 (5.7%)               | 335 (4.7%)                 |
| Diabetes mellitus without chronic complications            | 1,064 (16.6%)            | 998 (13.9%)                |
| Renal disease                                              | 731 (11.4%)              | 628 (8.8%)                 |
| Moderate to severe liver disease                           | 172 (2.7%)               | 205 (2.9%)                 |
| Chronic obstructive pulmonary disease                      | 1,148 (17.9%)            | 1,162 (16.2%)              |
| Malignant disease (with or without metastasis)             | 1,118 (17.5%)            | 1,040 (14.5%)              |
| Peptic ulcer disease                                       | 172 (2.7%)               | 202 (2.8%)                 |
| Dementia                                                   | 115 (1.8%)               | 84 (1.2%)                  |
| Hemiplegia                                                 | 245 (3.8%)               | 214 (3.0%)                 |
| HIV infection                                              | 64 (1.0%)                | 74 (1.0%)                  |
| CCI median, (IQR)                                          | 1 (0, 3)                 | 1 (0, 3)                   |



|                                                                                     |                         |                         |
|-------------------------------------------------------------------------------------|-------------------------|-------------------------|
| Home oxygen therapy                                                                 | 70 (1.1%)               | 67 (1.0%)               |
| <b>Intraoperative data</b>                                                          |                         |                         |
| Duration of surgery (min), median (IQR)                                             | 124.00 (87.00, 184.00)  | 112.00 (83.00, 163.00)  |
| Handover of anaesthesia care, n (%)                                                 | 879 (13.7%)             | 1,162 (16.2)            |
| Intraoperative hypotensive minutes of MAP <55mmHg, median (IQR)                     | 1.00 (0.00, 3.00)       | 1.00 (0.00, 3.00)       |
| Work RVUs, median (IQR)                                                             | 12.15 (8.07, 18.46)     | 10.62 (8.78, 17.82)     |
| Packed red blood cell units transfused intraoperatively, n (%)                      |                         |                         |
| 0 units                                                                             | 5,707 (89.1%)           | 6,565 (91.7%)           |
| 1 unit                                                                              | 299 (4.7%)              | 186 (2.6%)              |
| 2 units                                                                             | 240 (3.8%)              | 200 (2.8%)              |
| ≥ 3 units                                                                           | 158 (2.4%)              | 211 (2.9%)              |
| Total intraoperative vasopressor dose, norepinephrine equivalent (mg), median (IQR) | 0.02 (0.00, 0.21)       | 0.01 (0.00, 0.14)       |
| Median SpO <sub>2</sub> /FiO <sub>2</sub> ratio, median (IQR)                       | 178.57 (149.25, 208.33) | 178.57 (153.08, 202.02) |
| <b>Surgical service, n (%)</b>                                                      |                         |                         |
| Non-operating room anaesthesia                                                      | 43 (0.7%)               | 19 (0.3%)               |
| Burn surgery                                                                        | 29 (0.5%)               | 8 (0.1%)                |
| Acute care surgery                                                                  | 1,002 (15.6%)           | 1,632 (22.8%)           |
| General surgery                                                                     | 1,093 (17.1%)           | 1,621 (22.6%)           |
| Gynaecology                                                                         | 442 (6.9%)              | 642 (9.0%)              |
| Neurosurgery                                                                        | 560 (8.7%)              | 490 (6.8%)              |
| Oral/Maxillofacial surgery/Otolaryngology                                           | 46 (0.7%)               | 21 (0.3%)               |
| Orthopedic surgery                                                                  | 1,465 (22.9%)           | 997 (13.9%)             |
| Other                                                                               | 98 (1.5%)               | 85 (1.2%)               |
| Plastic surgery                                                                     | 98 (1.5%)               | 167 (2.3%)              |
| Radiology                                                                           | 32 (0.5%)               | 36 (0.5%)               |
| Surgical oncology                                                                   | 160 (2.5%)              | 237 (3.3%)              |
| Thoracic surgery                                                                    | 60 (0.9%)               | 25 (0.3%)               |
| Transplant surgery                                                                  | 55 (0.9%)               | 82 (1.1%)               |
| Urology                                                                             | 190 (3.0%)              | 128 (1.8%)              |
| Vascular surgery                                                                    | 221 (3.5%)              | 280 (3.9%)              |

|                                                                                                         |                 |               |
|---------------------------------------------------------------------------------------------------------|-----------------|---------------|
| Hospital network (institution A vs. B), n (%)                                                           | 131,544 (47.5%) | 6,554 (48.4%) |
| <b>Study outcomes, n (%)</b>                                                                            |                 |               |
| 30-day mortality                                                                                        | 226 (3.5 %)     | 219 (3.1%)    |
| 30-day morbidity                                                                                        | 691 (10.8%)     | 863 (12.0%)   |
| <b>Abbreviations:</b> ASA, American Society of Anaesthesiologists Physical Status Classification System |                 |               |

**eTable 9. Characteristics and distribution of variables after propensity score matching**

Normally distributed continuous variables were expressed as mean ( $\pm$  SD), non-normally distributed variables as median (IQR), and categorical variables as frequency (percentages).

| <b>PSM cohort<br/>n = 14,414</b>                                | <b>Day surgeries<br/>n = 7,207</b> | <b>Night surgeries<br/>n = 7,207</b> |
|-----------------------------------------------------------------|------------------------------------|--------------------------------------|
| Sex, male, n (%)                                                | 10,477 (50.6%)                     | 10,270 (49.6%)                       |
| Age (years), mean $\pm$ SD                                      | 53.17 $\pm$ 18.27                  | 51.96 $\pm$ 18.65                    |
| BMI (kg/m <sup>2</sup> ), mean $\pm$ SD                         | 27.88 $\pm$ 7.01                   | 27.79 $\pm$ 6.89                     |
| ASA $\geq$ 3, n (%)                                             | 9,415 (45.5%)                      | 8,676 (41.9%)                        |
| Admission type, n (%)                                           |                                    |                                      |
| Ambulatory                                                      | 3,079 (14.9%)                      | 3,002 (14.5%)                        |
| Same day admission                                              | 7,587 (36.6%)                      | 9,753 (47.1%)                        |
| Inpatient                                                       | 10,041 (48.5%)                     | 7,952 (38.4%)                        |
| <b>Comorbidities within one year prior to surgery n (%)</b>     |                                    |                                      |
| Coronary artery disease                                         | 2706 (13.1%)                       | 2505 (12.1%)                         |
| Myocardial infarction                                           | 1,200 (5.8%)                       | 1,099 (5.3%)                         |
| Heart failure                                                   | 2,173 (10.5%)                      | 2,018 (9.7%)                         |
| Ischemic stroke                                                 | 608 (2.9%)                         | 531 (2.6%)                           |
| Cerebrovascular disease                                         | 2,000 (9.7%)                       | 1,854 (9.0%)                         |
| Peripheral vascular disease                                     | 2,240 (10.8%)                      | 2,210 (10.7%)                        |
| Diabetes mellitus with chronic complications                    | 1,297 (6.3%)                       | 1,228 (5.9%)                         |
| Diabetes mellitus without chronic complications                 | 3,528 (17.0%)                      | 3,270 (15.8%)                        |
| Renal disease                                                   | 2,252 (10.9%)                      | 2,117 (10.2%)                        |
| Moderate to severe liver disease                                | 419 (2.0%)                         | 441 (2.1%)                           |
| Chronic obstructive pulmonary disease                           | 3,664 (17.7%)                      | 3,644 (17.6%)                        |
| Malignant disease (with or without metastasis)                  | 4,657 (22.5%)                      | 4,583 (22.1%)                        |
| Peptic ulcer disease                                            | 451 (2.2%)                         | 446 (2.2%)                           |
| Dementia                                                        | 299 (1.4%)                         | 246 (1.2%)                           |
| Hemiplegia                                                      | 693 (3.3%)                         | 688 (3.3%)                           |
| HIV infection                                                   | 274 (1.3%)                         | 222 (1.1%)                           |
| CCI, median (IQR)                                               | 1.00 (0.00, 3.00)                  | 1.00 (0.00, 3.00)                    |
| Home oxygen therapy                                             | 166 (0.8%)                         | 168 (0.8%)                           |
| <b>Intraoperative data</b>                                      |                                    |                                      |
| Duration of surgery (min), median (IQR), median (IQR)           | 117.00 (78.00, 177.00)             | 113.00 (80.00, 164.00)               |
| Handover of anaesthesia care, n (%)                             | 2,318 (23.7%)                      | 2,168 (23.2%)                        |
| Intraoperative hypotensive minutes of MAP <55mmHg, median (IQR) | 0.00 (0.00, 2.00)                  | 0.00 (0.00, 2.00)                    |
| Emergency surgery, n (%)                                        | 6,323 (30.5%)                      | 7,162 (34.6%)                        |
| Work RVUs, median (IQR)                                         | 11.43 (6.48, 18.00)                | 10.62 (7.08, 17.63)                  |

|                                                                                     |                         |                         |
|-------------------------------------------------------------------------------------|-------------------------|-------------------------|
| Packed red blood cell units transfused intraoperatively, n (%)                      |                         |                         |
| 0 units                                                                             | 19,377 (93.6%)          | 19,558 (94.5%)          |
| 1 unit                                                                              | 579 (2.8%)              | 469 (2.3%)              |
| 2 units                                                                             | 462 (2.2%)              | 373 (1.8%)              |
| ≥ 3 units                                                                           | 289 (1.4%)              | 307 (1.5%)              |
| Total intraoperative vasopressor dose, norepinephrine equivalent (mg), median (IQR) | 0.01 (0.00, 0.14)       | 0.01 (0.00, 0.11)       |
| Median SpO <sub>2</sub> /FiO <sub>2</sub> ratio, median (IQR)                       | 178.57 (151.52, 210.53) | 178.57 (152.31, 206.56) |
| <b>Surgical service, n (%)</b>                                                      |                         |                         |
| Non-operating room anaesthesia                                                      | 403 (1.9%)              | 244 (1.2%)              |
| Burn surgery                                                                        | 337 (1.6%)              | 59 (0.3%)               |
| Emergency surgical service                                                          | 1,935 (9.3%)            | 3,069 (14.8%)           |
| General surgery                                                                     | 3,544 (17.1%)           | 3,633 (17.5%)           |
| Gynaecology                                                                         | 1,563 (7.5%)            | 1,742 (8.4%)            |
| Neurosurgery                                                                        | 1,591 (7.7%)            | 1,806 (8.7%)            |
| Oral/Maxillofacial surgery                                                          | 140 (0.7%)              | 83 (0.4%)               |
| Orthopedic surgery                                                                  | 5,112 (24.7%)           | 3,936 (19.0%)           |
| Other                                                                               | 328 (1.6%)              | 318 (1.5%)              |
| Otolaryngology                                                                      | 399 (1.9%)              | 354 (1.7%)              |
| Paediatric surgery                                                                  | 71 (0.3%)               | 77 (0.4%)               |
| Plastic surgery                                                                     | 869 (4.2%)              | 1,005 (4.9%)            |
| Radiology                                                                           | 160 (0.8%)              | 145 (0.7%)              |
| Surgical oncology                                                                   | 416 (2.0%)              | 355 (1.7%)              |
| Thoracic surgery                                                                    | 1,099 (5.3%)            | 991 (4.8%)              |
| Transplant surgery                                                                  | 470 (2.3%)              | 757 (3.7%)              |
| Urology                                                                             | 1,288 (6.2%)            | 1,217 (5.9%)            |
| Vascular surgery                                                                    | 982 (4.7%)              | 916 (4.4%)              |
| Hospital network (institution A vs. B), n (%)                                       | 9,787 (47.3%)           | 9,378 (45.3%)           |

**eTable 10.a Association between major postoperative adverse events and night surgery compared with day surgery**

| Major postoperative adverse events | Day surgery<br>(n = 283,185) | Night surgery<br>(n = 20,707) | Unadjusted analysis                  |                        |         | Adjusted analysis                    |                        |         |
|------------------------------------|------------------------------|-------------------------------|--------------------------------------|------------------------|---------|--------------------------------------|------------------------|---------|
|                                    |                              |                               | Adjusted risk difference<br>(95% CI) | Odds ratio<br>(95% CI) | p-value | Adjusted risk difference<br>(95% CI) | Odds ratio<br>(95% CI) | p-value |
| <b>Acute kidney injury</b>         | 9,372 (3.31%)                | 1,406 (6.79%)                 | 3.48%<br>(3.13 to 3.83%)             | 2.13<br>(2.01–2.26)    | <0.001  | 0.24%<br>(0.16 to 0.31%)             | 1.29<br>(1.20 to 1.39) | <0.001  |
| <b>Stroke</b>                      | 1,694 (0.60%)                | 211 (1.02%)                   | 0.42%<br>(0.28 to 0.56%)             | 1.71<br>(1.48–1.98)    | <0.001  | 0.00%<br>(–0.01 to 0.01%)            | 1.04<br>(0.86 to 1.26) | 0.665   |

|                                                           |               |             |                          |                     |        |                           |                        |        |
|-----------------------------------------------------------|---------------|-------------|--------------------------|---------------------|--------|---------------------------|------------------------|--------|
| <b>Major adverse cardiac events (MACE)</b>                | 5,382 (1.90%) | 678 (3.27%) | 1.37%<br>(1.13 to 1.62%) | 1.75<br>(1.61–1.89) | <0.001 | 0.08%<br>(0.03 to 0.12%)  | 1.22<br>(1.10 to 1.36) | <0.001 |
| Myocardial infarction                                     | 881 (0.31%)   | 129 (0.62%) | 0.31%<br>(0.20 to 0.42%) | 2.01<br>(1.67–2.42) | <0.001 | 0.01%<br>(–0.01 to 0.02%) | 1.14<br>(0.93 to 1.42) | 0.204  |
| Cardiac arrest                                            | 255 (0.09%)   | 43 (0.21%)  | 0.12%<br>(0.05 to 0.18%) | 2.31<br>(1.67–3.19) | <0.001 | 0.01%<br>(–0.01 to 0.02%) | 1.21<br>(0.83 to 1.76) | 0.328  |
| Acute heart failure                                       | 4,545 (1.60%) | 564 (2.72%) | 1.12%<br>(0.89 to 1.35%) | 1.72<br>(1.57–1.88) | <0.001 | 0.06%<br>(0.03 to 0.10%)  | 1.27<br>(1.13 to 1.43) | <0.001 |
| <b>Reintubation*</b>                                      | 1,738 (0.62%) | 291 (1.49%) | 0.87%<br>(0.69 to 1.04%) | 2.41<br>(2.12–2.73) | <0.001 | 0.05%<br>(0.02 to 0.07%)  | 1.35<br>(1.17 to 1.56) | <0.001 |
| *Reintubation in a subgroup of available data (n=297,778) |               |             |                          |                     |        |                           |                        |        |

**eTable 10.b Postoperative complications stratified by patients who died within 30 days versus patients who survived**

| Postoperative complications                                  | Deceased within 30 days<br>n = 2,234 | Survived within 30 days<br>n = 301,658 | p-value |
|--------------------------------------------------------------|--------------------------------------|----------------------------------------|---------|
| <b>Acute kidney injury</b>                                   | 542 (24.26%)                         | 10,236 (3.39%)                         | <0.001  |
| <b>Major adverse cardiac events (MACE)</b>                   | 292 (13.07%)                         | 5,768 (1.91%)                          | <0.001  |
| Cardiac arrest                                               | 107 (4.79%)                          | 191 (0.06%)                            | <0.001  |
| Acute heart failure                                          | 162 (7.25%)                          | 4,497 (1.64%)                          | <0.001  |
| <b>Reintubation *</b>                                        | 293 (16.92%)                         | 1,736 (0.59%)                          | <0.001  |
| * Reintubation in a subgroup of available data (n = 297,778) |                                      |                                        |         |

**eTable 11. ICD-9 and ICD-10 codes to define a recent history of solid/non-solid cancer**

A one-year history of solid/non-solid cancer was based on the International Classification of Diseases, Ninth and Tenth Revision (ICD-9 and ICD-10 codes).<sup>10</sup>

| Variable     | ICD-9 code | ICD-10 code                | Description                                                      |
|--------------|------------|----------------------------|------------------------------------------------------------------|
| Solid cancer | 140.X      | C00.X                      | Malignant neoplasm of lip                                        |
|              | 141.X      | C01.X, C02.X               | Malignant neoplasm of tongue                                     |
|              | 142.X      | C07.X, C08.X               | Malignant neoplasm of major salivary glands                      |
|              | 143.X      | C03.X                      | Malignant neoplasm of gum                                        |
|              | 144.X      | C04.X                      | Malignant neoplasm of floor of mouth                             |
|              | 145.X      | C05.X, C06.X, C09.X, C14.X | Malignant neoplasm of other and unspecified parts of mouth       |
|              | 146.X      | C10.X                      | Malignant neoplasm of oropharynx                                 |
|              | 147.X      | C11.X                      | Malignant neoplasm of nasopharynx                                |
|              | 148.X      | C12.X, C13.X               | Malignant neoplasm of hypopharynx                                |
|              | 149.X      | C14.X                      | Malignant neoplasm of other and ill-defined sites within the lip |
|              | 150.X      | C15.X                      | Malignant neoplasm of oesophagus                                 |
|              | 151.X      | C16.X                      | Malignant neoplasm of stomach                                    |
|              | 152.X      | C17.X                      | Malignant neoplasm of small intestine, including duodenum        |
|              | 153.X      | C18.X                      | Malignant neoplasm of colon                                      |



|       |                     |                                                                                                          |
|-------|---------------------|----------------------------------------------------------------------------------------------------------|
| 154.X | C19.X, C20.X, C21.X | Malignant neoplasm of rectum, rectosigmoid junction, and anus                                            |
| 155.X | C22.X               | Malignant neoplasm of liver and intrahepatic bile ducts                                                  |
| 156.X | C23.X, C24.X        | Malignant neoplasm of gallbladder and extrahepatic bile ducts                                            |
| 157.X | C25.X               | Malignant neoplasm of pancreas                                                                           |
| 158.X | C48.X               | Malignant neoplasm of retroperitoneum and peritoneum                                                     |
| 159.X | C26.X               | Malignant neoplasm of other and ill-defined sites within the digestive organs and peritoneum             |
| 160.X | C30.X, C31.X        | Malignant neoplasm of nasal cavities, middle ear, and accessory sinuses                                  |
| 161.X | C32.X               | Malignant neoplasm of larynx                                                                             |
| 162.X | C33.X, C34.X        | Malignant neoplasm of trachea, bronchus, and lung                                                        |
| 163.X | C38.X               | Malignant neoplasm of pleura                                                                             |
| 164.X | C37.X, C38.X        | Malignant neoplasm of thymus, heart, and mediastinum                                                     |
| 165.X | C39.X               | Malignant neoplasm of other and ill-defined sites within the respiratory system and intrathoracic organs |
| 170.X | C40.X, C41.X        | Malignant neoplasm of bone and articular cartilage                                                       |

|       |                            |                                                                       |
|-------|----------------------------|-----------------------------------------------------------------------|
| 171.X | C45.X, C49.X               | Malignant neoplasm of connective and other soft tissue                |
| 172.X | C43.X                      | Malignant melanoma of skin                                            |
| 173.X | C44.X                      | Other malignant neoplasm of skin                                      |
| 174.X | C50.X                      | Malignant neoplasm of female breast                                   |
| 175.X | C50.X                      | Malignant neoplasm of male breast                                     |
| 176.X | C46.X                      | Kaposi's sarcoma                                                      |
| 179.X | C55.X                      | Malignant neoplasm of uterus, part unspecified                        |
| 180.X | C53.X                      | Malignant neoplasm of cervix uteri                                    |
| 181.X | C58.X                      | Malignant neoplasm of placenta                                        |
| 182.X | C54.X                      | Malignant neoplasm of body of uterus                                  |
| 183.X | C56.X                      | Malignant neoplasm of ovary and other uterine adnexa                  |
| 184.X | C51.X, C52.X, C57.X        | Malignant neoplasm of other and unspecified female genital organs     |
| 185.X | C61.X                      | Malignant neoplasm of prostate                                        |
| 186.X | C62.X                      | Malignant neoplasm of testis                                          |
| 187.X | C60.X, C63.X               | Malignant neoplasm of penis and other male genital organs             |
| 188.X | C67.X                      | Malignant neoplasm of bladder                                         |
| 189.X | C64.X, C65.X, C66.X, C68.X | Malignant neoplasm of kidney and other and unspecified urinary organs |
| 190.X | C69.X                      | Malignant neoplasm of eye                                             |

|                                                  |        |                     |                                                                     |
|--------------------------------------------------|--------|---------------------|---------------------------------------------------------------------|
|                                                  | 191.X  | C71.X               | Malignant neoplasm of brain                                         |
|                                                  | 192.X  | C47.X, C70.X, C72.X | Malignant neoplasm of other and unspecified parts of nervous system |
|                                                  | 193.X  | C73.X               | Malignant neoplasm of thyroid gland                                 |
|                                                  | 194.X  | C74.X, C75.X        | Malignant neoplasm of other endocrine glands and related structures |
| <i>Definitions of solid cancer primary sites</i> |        |                     |                                                                     |
| Lung                                             | 162.2, |                     |                                                                     |
|                                                  | 162.3, |                     |                                                                     |
|                                                  | 162.4, | C34.X               | Malignant neoplasm of bronchus and lung                             |
|                                                  | 162.5, |                     |                                                                     |
|                                                  | 162.8, |                     |                                                                     |
| Breast                                           | 162.9  |                     |                                                                     |
|                                                  | 174.X  |                     |                                                                     |
|                                                  | 233.0  | C50                 | Malignant neoplasm of breast                                        |
|                                                  | 153.X  |                     |                                                                     |
| Colorectal                                       | 154.0, |                     |                                                                     |
|                                                  | 154.1, | C18.X               | Malignant neoplasm of colon                                         |
|                                                  | 154.2, | C20                 | Malignant neoplasm of rectum                                        |
|                                                  | 154.3, |                     |                                                                     |
|                                                  | 154.8  |                     |                                                                     |
| Prostate                                         | 185,   |                     |                                                                     |
|                                                  | 233.4  | C61                 | Malignant neoplasm of prostate                                      |

|               |       |       |                                                             |
|---------------|-------|-------|-------------------------------------------------------------|
| Pancreatic    | 157.X | C25.X | Malignant neoplasm of pancreas                              |
| Brain         | 191.X | C71.X | Malignant neoplasm of brain                                 |
|               | 155.X | C22.X | Malignant neoplasm of liver and intrahepatic bile ducts     |
| Hepatobiliary | 156.X | C23   | Malignant neoplasm of gallbladder                           |
| Cervical      | 180.X | C53.X | Malignant neoplasm of cervix uteri                          |
| Ovarian       | 183.0 | C56.X | Malignant neoplasm of ovary                                 |
| Kidney        | 189.0 | C64.0 | Malignant neoplasm of kidney, except renal pelvis           |
| Thyroid       | 193.X | C73   | Malignant neoplasm of thyroid gland                         |
|               | 150.X | C15.X | Malignant neoplasm of esophagus                             |
| Oesophageal   |       |       |                                                             |
| Stomach       | 151.X | C16.0 | Malignant neoplasm of stomach                               |
| Bladder       | 188.X | C67.X | Malignant neoplasm of bladder                               |
|               | 182.X | C54.X | Malignant neoplasm of corpus uteri                          |
| Uterus        |       |       | Malignant neoplasm of uterus, part unspecified              |
|               | 179.X | C55.X |                                                             |
| Malignant     | 172.X | C43.X | Malignant melanoma of skin                                  |
| Melanoma      |       |       |                                                             |
|               | 140.X | C00.X | Malignant neoplasm of lip                                   |
|               | 141.X | C01.X | Malignant neoplasm of base of tongue                        |
| Lip and oral  |       |       |                                                             |
| cavity        |       | C02.X | Malignant neoplasm of other and unspecified parts of tongue |
|               | 143.X | C03.X | Malignant neoplasm of gum                                   |

|                   |       |        |                                                                  |
|-------------------|-------|--------|------------------------------------------------------------------|
|                   | 144.X | C04.X  | Malignant neoplasm of floor of mouth                             |
|                   | 145.X | C05.X  | Malignant neoplasm of palate                                     |
|                   | 149.X | C06.X  | Malignant neoplasm of other and unspecified parts of mouth       |
| Metastatic cancer | 196.X | C77.X  | Secondary and unspecified malignant neoplasm of lymph nodes      |
|                   | 197.X | C78.XX | Secondary malignant neoplasm of respiratory and digestive organs |
|                   | 198.X | C79.XX | Secondary malignant neoplasm of other and unspecified sites      |
|                   | 199.X | C80.0  | Disseminated malignant neoplasm, unspecified                     |

|                           |       |                                                       |                                                              |
|---------------------------|-------|-------------------------------------------------------|--------------------------------------------------------------|
| Non-solid types of cancer | 200.X |                                                       | Lymphosarcoma and reticulosarcoma                            |
|                           | 201.X | C81.X                                                 | Hodgkin's disease                                            |
|                           | 202.X | C82.X, C83.X, C84.X, C85X, C86.X, C96.X, C88.X, C90.X | Other malignant neoplasms of lymphoid and histiocytic tissue |
|                           | 203.X |                                                       | Multiple myeloma and immunoproliferative neoplasms           |
|                           |       | C91.X                                                 |                                                              |
|                           | 204.X | C92.X                                                 | Lymphoid leukaemia                                           |
|                           | 205.X | C93.X                                                 | Myeloid leukaemia                                            |
|                           | 206.X | C94.X                                                 | Monocytic leukaemia                                          |

|       |       |                                    |
|-------|-------|------------------------------------|
| 207.X | C95.X | Other specified leukaemia          |
| 208.X |       | Leukaemia of unspecified cell type |

**eTable 12. Results of 30-day mortality and morbidity categorised by the time surgery started**

| <b>30-day mortality</b> |                                      |                |                |                              |
|-------------------------|--------------------------------------|----------------|----------------|------------------------------|
| <b>Operation time</b>   | <b>OR<sub>adj</sub><br/>(95% CI)</b> | <b>p-value</b> | <b>Total n</b> | <b>n of positive outcome</b> |
| 7:00-11:59 AM           | Baseline                             | Baseline       | 165,922        | 804                          |
| 12 PM                   | 1.13 (0.95-1.35)                     | 0.178          | 27,140         | 182                          |
| 1 PM                    | 1.10 (0.92-1.31)                     | 0.288          | 29,802         | 188                          |
| 2 PM                    | 1.13 (0.95-1.34)                     | 0.176          | 26,402         | 211                          |
| 3 PM                    | 1.25 (1.04-1.49)                     | 0.015          | 20,687         | 217                          |
| 4 PM                    | 1.32 (1.08-1.62)                     | 0.007          | 13,214         | 166                          |
| 5-6 PM                  | 1.45 (1.19-1.78)                     | <0.001         | 9,553          | 194                          |
| 7-8 PM                  | 1.50 (1.13-1.99)                     | 0.005          | 4,543          | 113                          |
| 9-10 PM                 | 1.91 (1.31-2.80)                     | 0.001          | 2,688          | 67                           |
| 11 PM - 6:59 AM         | 1.21 (0.70-2.09)                     | 0.488          | 3,941          | 92                           |
| <b>30-day morbidity</b> |                                      |                |                |                              |
| <b>Operation time</b>   | <b>OR<sub>adj</sub><br/>(95% CI)</b> | <b>p-value</b> | <b>Total n</b> | <b>n of positive outcome</b> |
| 7:00-11:59 AM           | Baseline                             | Baseline       | 165,922        | 13,681                       |
| 12 PM                   | 0.98 (0.93-1.04)                     | 0.339          | 27,140         | 2,097                        |
| 1 PM                    | 0.97 (0.92-1.02)                     | 0.170          | 29,802         | 2,274                        |
| 2 PM                    | 0.99 (0.94-1.05)                     | 0.627          | 26,402         | 2,061                        |
| 3 PM                    | 1.06 (0.99-1.12)                     | 0.073          | 20,687         | 1,676                        |
| 4 PM                    | 1.11 (1.03-1.19)                     | 0.008          | 13,214         | 1,126                        |
| 5-6 PM                  | 1.35 (1.24-1.47)                     | <0.001         | 9,553          | 1,041                        |
| 7-8 PM                  | 1.65 (1.47-1.86)                     | <0.001         | 4,543          | 654                          |
| 9-10 PM                 | 1.92 (1.64-2.25)                     | <0.001         | 2,688          | 443                          |
| 11 PM - 6:59 AM         | 1.54 (1.29-1.84)                     | <0.001         | 3,941          | 589                          |

**eTable 13. Subgroup analysis of the 50 most frequently performed procedures**

Defined by primary surgery Current Procedural Terminology (CPT) codes. A total of 108,338 participants were included in this subgroup analysis.

| CPT code description <sup>12 13</sup>                                                                                                                                                                                    | CPT   | Frequency | Percent |
|--------------------------------------------------------------------------------------------------------------------------------------------------------------------------------------------------------------------------|-------|-----------|---------|
| Laparoscopy, surgical; cholecystectomy                                                                                                                                                                                   | 47562 | 8,545     | 7.89    |
| Arthroscopy, knee, surgical; with meniscectomy (medial OR lateral, including any meniscal shaving) including debridement/shaving of articular cartilage (chondroplasty), same or separate compartment(s), when performed | 29881 | 4,841     | 4.47    |
| Laparoscopy, surgical; with removal of adnexal structures (partial or total oophorectomy and/or salpingectomy)                                                                                                           | 58661 | 4,547     | 4.2     |
| Arthroplasty, knee, condyle and plateau; medial AND lateral compartments with or without patella resurfacing (total knee arthroplasty)                                                                                   | 27447 | 3,992     | 3.68    |
| Arthroplasty, acetabular and proximal femoral prosthetic replacement (total hip arthroplasty), with or without autograft or allograft                                                                                    | 27130 | 3,684     | 3.4     |
| Thyroidectomy, total or complete                                                                                                                                                                                         | 60240 | 3,645     | 3.36    |
| Hysteroscopy, surgical; with sampling (biopsy) of endometrium and/or polypectomy, with or without D & C                                                                                                                  | 58558 | 3,460     | 3.19    |
| Laparoscopy, surgical, appendectomy                                                                                                                                                                                      | 44970 | 3,333     | 3.08    |
| Laminotomy (hemilaminectomy), with decompression of nerve root(s), including partial facetectomy, foraminotomy and/or excision of herniated intervertebral disc; 1 interspace, lumbar                                    | 63030 | 2,974     | 2.75    |
| Arthrodesis, posterior or posterolateral technique, single level; lumbar (with lateral transverse technique, when performed)                                                                                             | 22612 | 2,873     | 2.65    |
| Thromboendarterectomy, including patch graft, if performed;                                                                                                                                                              | 35301 | 2,776     | 2.56    |



|                                                                                                                                                                                                                     |       |       |      |
|---------------------------------------------------------------------------------------------------------------------------------------------------------------------------------------------------------------------|-------|-------|------|
| carotid, vertebral, subclavian, by neck incision                                                                                                                                                                    |       |       |      |
| Repair initial inguinal hernia, age 5 years or older; reducible                                                                                                                                                     | 49505 | 2,669 | 2.46 |
| Laparoscopy, surgical, with total hysterectomy, for uterus 250 g or less; with removal of tube(s) and/or ovary(s)                                                                                                   | 58571 | 2,657 | 2.45 |
| Arthroscopy, shoulder, surgical; with rotator cuff repair                                                                                                                                                           | 29827 | 2,626 | 2.42 |
| Total abdominal hysterectomy (corpus and cervix), with or without removal of tube(s), with or without removal of ovary(s)                                                                                           | 58150 | 2,589 | 2.39 |
| Reduction mammoplasty                                                                                                                                                                                               | 19318 | 2,555 | 2.36 |
| Parathyroidectomy or exploration of parathyroid(s)                                                                                                                                                                  | 60500 | 2,490 | 2.3  |
| Laparoscopy, surgical prostatectomy, retropubic radical, including nerve sparing, includes robotic assistance, when performed                                                                                       | 55866 | 2,435 | 2.25 |
| Biopsy or excision of lymph node(s); open, deep axillary node(s)                                                                                                                                                    | 38525 | 2,123 | 1.96 |
| Removal of implant; deep (e.g., buried wire, pin, screw, metal band, nail, rod or plate)                                                                                                                            | 20680 | 2,099 | 1.94 |
| Craniectomy, trephination, bone flap craniotomy; for excision of brain tumour, supratentorial, except meningioma                                                                                                    | 61510 | 2,088 | 1.93 |
| Laminectomy, facetectomy and foraminotomy (unilateral or bilateral with decompression of spinal cord, cauda equina and/or nerve root[s], [eg, spinal or lateral recess stenosis]), single vertebral segment; lumbar | 63047 | 2,059 | 1.9  |
| Bronchoscopy, rigid or flexible, including fluoroscopic guidance, when performed; with transbronchial needle aspiration biopsy(s), trachea, main stem and/or lobar bronchus(i)                                      | 31629 | 1,995 | 1.84 |
| Cystourethroscopy, with ureteroscopy and/or pyeloscopy; with lithotripsy (ureteral catheterization is included)                                                                                                     | 52353 | 1,938 | 1.79 |

|                                                                                                                                                                                 |       |       |      |
|---------------------------------------------------------------------------------------------------------------------------------------------------------------------------------|-------|-------|------|
| Repair initial incisional or ventral hernia; reducible                                                                                                                          | 49560 | 1,888 | 1.74 |
| Gastric restrictive procedure, with gastric bypass for morbid obesity; with short limb (150 cm or less) Roux-en-Y gastroenterostomy                                             | 43644 | 1,684 | 1.55 |
| Arthrodesis, anterior interbody technique, including minimal discectomy to prepare interspace (other than for decompression); cervical below C2                                 | 22554 | 1,669 | 1.54 |
| Arthroscopically aided anterior cruciate ligament repair/augmentation or reconstruction                                                                                         | 29888 | 1,616 | 1.49 |
| Laparoscopy, surgical, gastric restrictive procedure; longitudinal gastrectomy (ie, sleeve gastrectomy)                                                                         | 43775 | 1,592 | 1.47 |
| Laparoscopy, surgical; repair initial inguinal hernia                                                                                                                           | 49650 | 1,486 | 1.37 |
| Mediastinoscopy - expired code                                                                                                                                                  | 39400 | 1,430 | 1.32 |
| Arthrodesis, anterior interbody technique, including minimal discectomy to prepare interspace (other than for decompression); lumbar                                            | 22558 | 1,419 | 1.31 |
| Laparoscopy, surgical; colectomy, partial, with anastomosis                                                                                                                     | 44204 | 1,403 | 1.3  |
| Arthroplasty, glenohumeral joint; total shoulder (glenoid and proximal humeral replacement (e.g., total shoulder))                                                              | 23472 | 1,400 | 1.29 |
| Revision of reconstructed breast                                                                                                                                                | 19380 | 1,382 | 1.28 |
| Repair umbilical hernia, age 5 years or older; reducible                                                                                                                        | 49585 | 1,194 | 1.1  |
| Pancreatectomy, proximal subtotal with total duodenectomy, partial gastrectomy, choledochoenterostomy and gastrojejunostomy (Whipple-type procedure); with pancreatojejunostomy | 48150 | 1,183 | 1.09 |
| Enterectomy, resection of small intestine; single resection and anastomosis                                                                                                     | 44120 | 1,177 | 1.09 |
| Nasal/sinus endoscopy, surgical; with biopsy, polypectomy or                                                                                                                    | 31237 | 1,176 | 1.09 |

|                                                                                                                                                                                                                           |       |       |      |
|---------------------------------------------------------------------------------------------------------------------------------------------------------------------------------------------------------------------------|-------|-------|------|
| debridement (separate procedure)                                                                                                                                                                                          |       |       |      |
| Treatment of intertrochanteric, peritrochanteric, or subtrochanteric femoral fracture; with intramedullary implant, with or without interlocking screws and/or cerclage                                                   | 27245 | 1,109 | 1.02 |
| Arthroscopy, knee, surgical; with meniscectomy (medial AND lateral, including any meniscal shaving) including debridement/shaving of articular cartilage (chondroplasty), same or separate compartment(s), when performed | 29880 | 1,088 | 1    |
| Total thyroid lobectomy, unilateral; with or without isthmusectomy                                                                                                                                                        | 60220 | 1,087 | 1    |
| Thyroidectomy, including substernal thyroid; cervical approach                                                                                                                                                            | 60271 | 1,082 | 1    |
| Mastectomy, partial                                                                                                                                                                                                       | 19302 | 1,076 | 0.99 |
| Septoplasty or submucous resection, with or without cartilage scoring, contouring or replacement with graft                                                                                                               | 30520 | 1,067 | 0.98 |
| Colectomy, partial; with anastomosis                                                                                                                                                                                      | 44140 | 1,059 | 0.98 |
| Thoracoscopy, surgical; with lobectomy (single lobe)                                                                                                                                                                      | 32663 | 1,036 | 0.96 |
| Renal allotransplantation, implantation of graft; without recipient nephrectomy                                                                                                                                           | 50360 | 1,018 | 0.94 |
| Cystourethroscopy, with insertion of indwelling ureteral stent (e.g., Gibbons or double-J type)                                                                                                                           | 52332 | 1,014 | 0.94 |
| Cholecystectomy                                                                                                                                                                                                           | 47600 | 1,010 | 0.93 |

**eTable 14. Results of additional subgroup analyses**

Sensitivity analyses evaluating the robustness of the primary analysis within additional subgroups.

| Subgroup analysis by:                                                                         | OR <sub>adj</sub> , p-value | Sample size |
|-----------------------------------------------------------------------------------------------|-----------------------------|-------------|
| Age (quartiles)                                                                               | 1.86 p=0.03                 | 77,179      |
|                                                                                               | 1.44 p=0.028                | 73,344      |
|                                                                                               | 1.37 p=0.014                | 73,783      |
|                                                                                               | 1.31 p=0.001                | 72,242      |
| Work RVUs (quartiles)                                                                         | 1.37 p=0.003                | 76,508      |
|                                                                                               | 1.41 p=0.029                | 74,991      |
|                                                                                               | 1.46 p=0.003                | 68,957      |
|                                                                                               | 1.32 p=0.024                | 74,975      |
| Hospital network (institution A versus B)                                                     | 1.52 p<0.001                | 143,860     |
|                                                                                               | 1.22 p=0.013                | 159,957     |
| Anaesthesia provider type (residents, certified registered nurse anaesthetist, or attendings) | 1.33 p<0.001                | 178,283     |
|                                                                                               | 1.47 p=0.018                | 85,517      |
|                                                                                               | 1.41 p=0.017                | 39,686      |

**eTable 15. Results after adjusting for additional confounding variables**

Additional confounding variables were separately added to the logistic regression model.

| <b>Additional confounding variable</b>                                                                                       | <b>OR<sub>adj</sub><br/>[95% CI], p-value</b> | <b>Sample size*</b> |
|------------------------------------------------------------------------------------------------------------------------------|-----------------------------------------------|---------------------|
| Weekend surgery                                                                                                              | 1.36 [1.20-1.53], p<0.001                     | Full cohort         |
| Procedural severity score <sup>14</sup>                                                                                      | 1.37 [1.19-1.56], p<0.001                     | 240,855             |
| Community hospital status                                                                                                    | 1.36 [1.20-1.53], p<0.001                     | Full cohort         |
| Intraoperative opioid dose                                                                                                   | 1.37 [1.21-1.54], p<0.001                     | Full cohort         |
| Score for Prediction of Postoperative Respiratory Complications > 6 <sup>15</sup>                                            | 1.36 [1.20-1.53], p<0.001                     | Full cohort         |
| NMBA dose (measured as multiples of NMBA dose needed to reduce twitch height by 95 %)                                        | 1.36 [1.20-1.53], p<0.001                     | 303,887             |
| Age-adjusted minimum alveolar concentration of volatiles and nitrous oxide <sup>16</sup>                                     | 1.35 [1.19-1.52], p<0.001                     | Full cohort         |
| Federal insurance status                                                                                                     | 1.35 [1.20-1.53], p<0.001                     | 303,671             |
| *The number of patients per analysis was determined by the data that were available for the additional confounding variable. |                                               |                     |

**eTable 16. ICD-9 and ICD-10 codes to define potential causes of death (validated postoperative complications).**

| Types of complications | ICD-9 and ICD-10 diagnostic and procedure codes                                                                                                                                                                                                                                                                                                                                                                                                                                                                                                                                               |
|------------------------|-----------------------------------------------------------------------------------------------------------------------------------------------------------------------------------------------------------------------------------------------------------------------------------------------------------------------------------------------------------------------------------------------------------------------------------------------------------------------------------------------------------------------------------------------------------------------------------------------|
| Acute renal failure    | <p>584.5 Acute kidney failure with lesion of tubular necrosis</p> <p>584.6 Acute kidney failure with lesion of renal cortical necrosis</p> <p>584.7 Acute kidney failure with lesion of renal medullary [papillary] necrosis</p> <p>584.8 Acute kidney failure with other specified pathological lesion in Kidney</p> <p>N17.0 Acute kidney failure with tubular necrosis</p> <p>N17.1 Acute kidney failure with acute cortical necrosis</p> <p>N17.2 Acute kidney failure with medullary necrosis</p> <p>N17.8 Other acute kidney failure</p> <p>N17.9 Acute kidney failure, unspecified</p> |
| Myocardial infarction  | <p>410 Acute myocardial infarction</p> <p>I21 Acute myocardial infarction</p> <p>I22 Subsequent ST elevation (STEMI) and non-ST elevation (NSTEM) myocardial infarction</p>                                                                                                                                                                                                                                                                                                                                                                                                                   |
| Cardiac arrest         | <p>427.5 Cardiac arrest</p> <p>I46 Cardiac arrest</p>                                                                                                                                                                                                                                                                                                                                                                                                                                                                                                                                         |

|                     |                                                                                               |
|---------------------|-----------------------------------------------------------------------------------------------|
| Acute heart failure | 428.0 Congestive heart failure, unspecified                                                   |
|                     | 428.1 Left heart failure                                                                      |
|                     | 428.20 Systolic heart failure, unspecified                                                    |
|                     | 428.21 Acute systolic heart failure                                                           |
|                     | 428.23 Acute on chronic systolic heart failure                                                |
|                     | 428.30 Diastolic heart failure, unspecified                                                   |
|                     | 428.31 Acute diastolic heart failure                                                          |
|                     | 428.33 Acute on chronic diastolic heart failure                                               |
|                     | 428.40 Combined systolic and diastolic heart failure, unspecified                             |
|                     | 428.41 Acute combined systolic and diastolic heart failure                                    |
|                     | 428.43 Acute on chronic combined systolic and diastolic heart failure                         |
|                     | 428.9 Heart failure, unspecified                                                              |
|                     |                                                                                               |
|                     | I50.1 Left ventricular failure, unspecified                                                   |
|                     | I50.20 Unspecified systolic (congestive) heart failure                                        |
|                     | I50.21 Acute systolic (congestive) heart failure                                              |
|                     | I50.23 Acute on chronic systolic (congestive) heart failure                                   |
|                     | I50.30 Unspecified diastolic (congestive) heart failure                                       |
|                     | I50.31 Acute diastolic (congestive) heart failure                                             |
|                     | I50.33 Acute on chronic diastolic (congestive) heart failure                                  |
|                     | I50.40 Unspecified combined systolic (congestive) and diastolic<br>(congestive) heart failure |
|                     | I50.41 Acute combined systolic (congestive) and diastolic (congestive)<br>heart failure       |

|        |                                                                                                                                                                                                                                                                                                                                                                                                                                                                                                                                                                                                                                                                                                                                                                                                                                                                                                                                                                                                                                                                         |
|--------|-------------------------------------------------------------------------------------------------------------------------------------------------------------------------------------------------------------------------------------------------------------------------------------------------------------------------------------------------------------------------------------------------------------------------------------------------------------------------------------------------------------------------------------------------------------------------------------------------------------------------------------------------------------------------------------------------------------------------------------------------------------------------------------------------------------------------------------------------------------------------------------------------------------------------------------------------------------------------------------------------------------------------------------------------------------------------|
|        | <p>I50.43 Acute on chronic combined systolic (congestive) and diastolic (congestive) heart failure</p> <p>I50.9 Heart failure, unspecified</p>                                                                                                                                                                                                                                                                                                                                                                                                                                                                                                                                                                                                                                                                                                                                                                                                                                                                                                                          |
| Stroke | <p>433.01 Occlusion and stenosis of basilar artery with cerebral infarction</p> <p>433.11 Occlusion and stenosis of carotid artery with cerebral infarction</p> <p>433.21 Occlusion and stenosis of vertebral artery with cerebral infarction</p> <p>433.31 Occlusion and stenosis of multiple and bilateral precerebral arteries with cerebral infarction</p> <p>433.81 Occlusion and stenosis of other specified precerebral artery with cerebral infarction</p> <p>433.91 Occlusion and stenosis of unspecified precerebral artery with cerebral infarction</p> <p>434.01 Cerebral thrombosis with cerebral infarction</p> <p>434.11 Cerebral embolism with cerebral infarction</p> <p>434.91 Cerebral artery occlusion, unspecified with cerebral infarction</p> <p>437.1 Other generalized ischemic cerebrovascular disease</p> <p>437.9 Unspecified cerebrovascular disease</p><br><p>I63 Cerebral infarction</p> <p>I67.81 Acute cerebrovascular insufficiency</p> <p>I67.89 Other cerebrovascular disease</p> <p>I67.9 Cerebrovascular disease, unspecified</p> |



8 Supplemental figures

eFigure 1. Distribution of emergency and non-emergency cases throughout the day

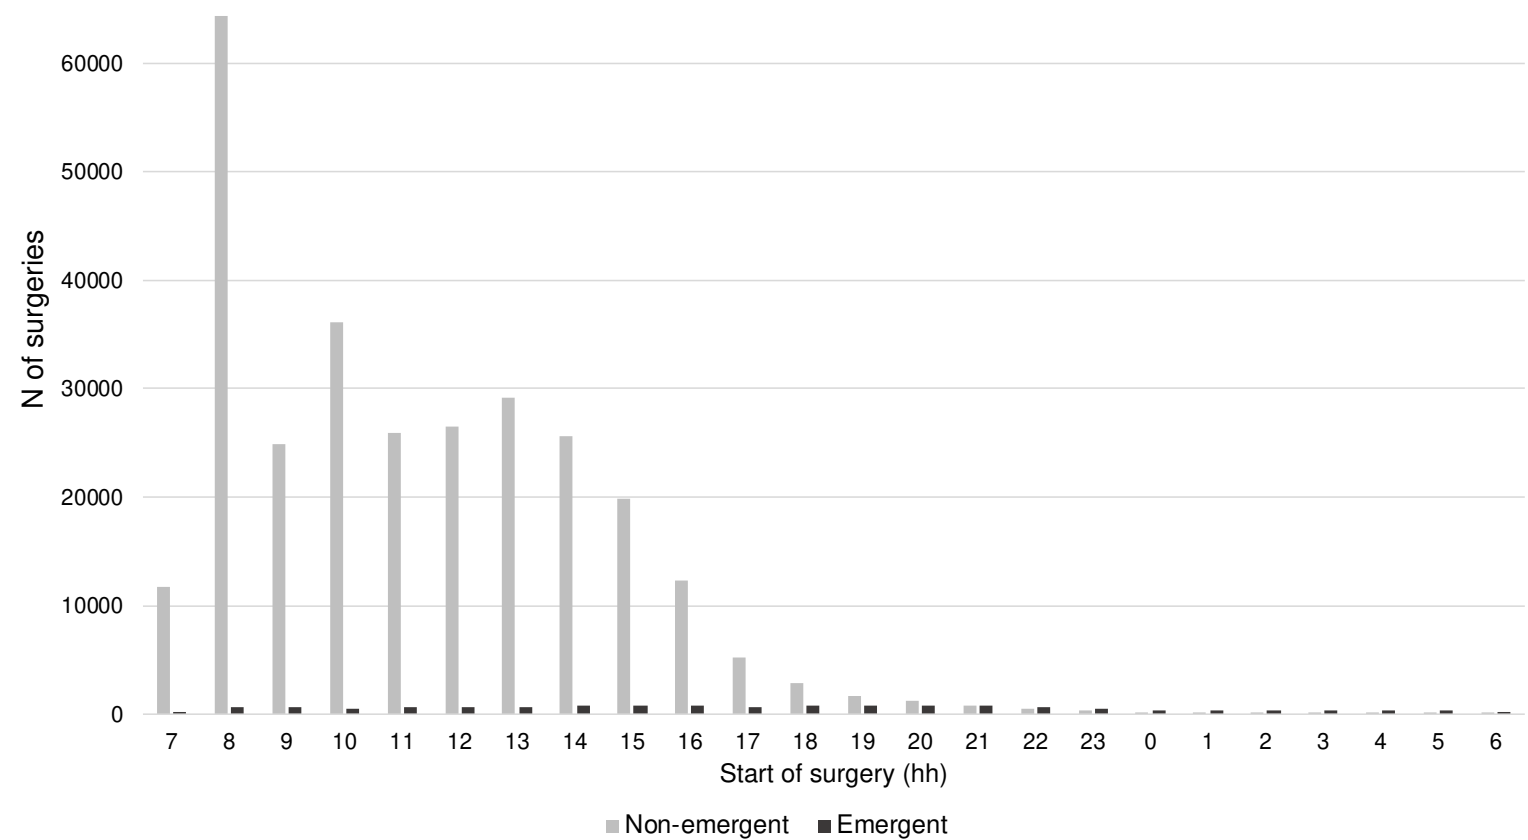

**eFigure 2a. Adjusted odds ratios for mortality within 30 days of non-emergency surgery**

Odds of 30-day mortality and morbidity after surgery started 3:00-10:59 pm and 3:00pm-6:59 am, respectively, were significantly higher ( $p<0.05$ ) than after baseline risk morning hours from 07:00 to 11:59 h. The figure demonstrates adjusted odds ratios (—) and 95% confidence intervals (---) compared with baseline risk morning hours (□).

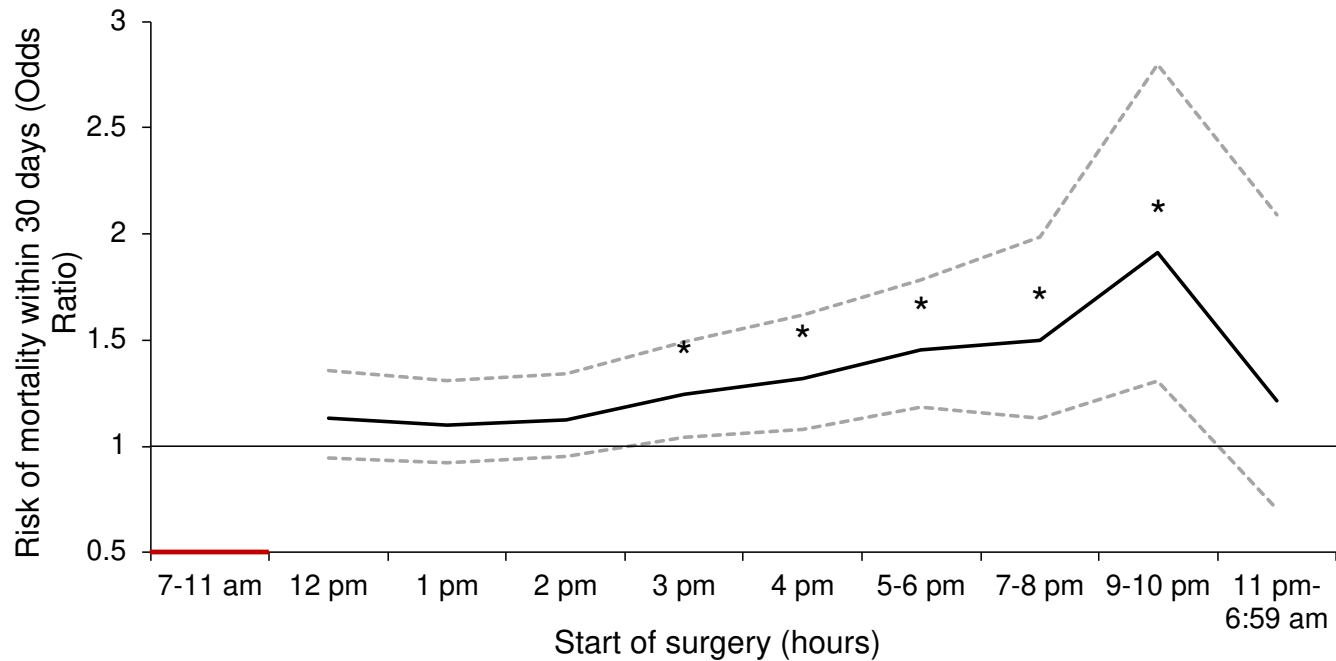

eFigure 2b. Adjusted odds ratios for 30-day morbidity within 30 days of non-emergency surgery

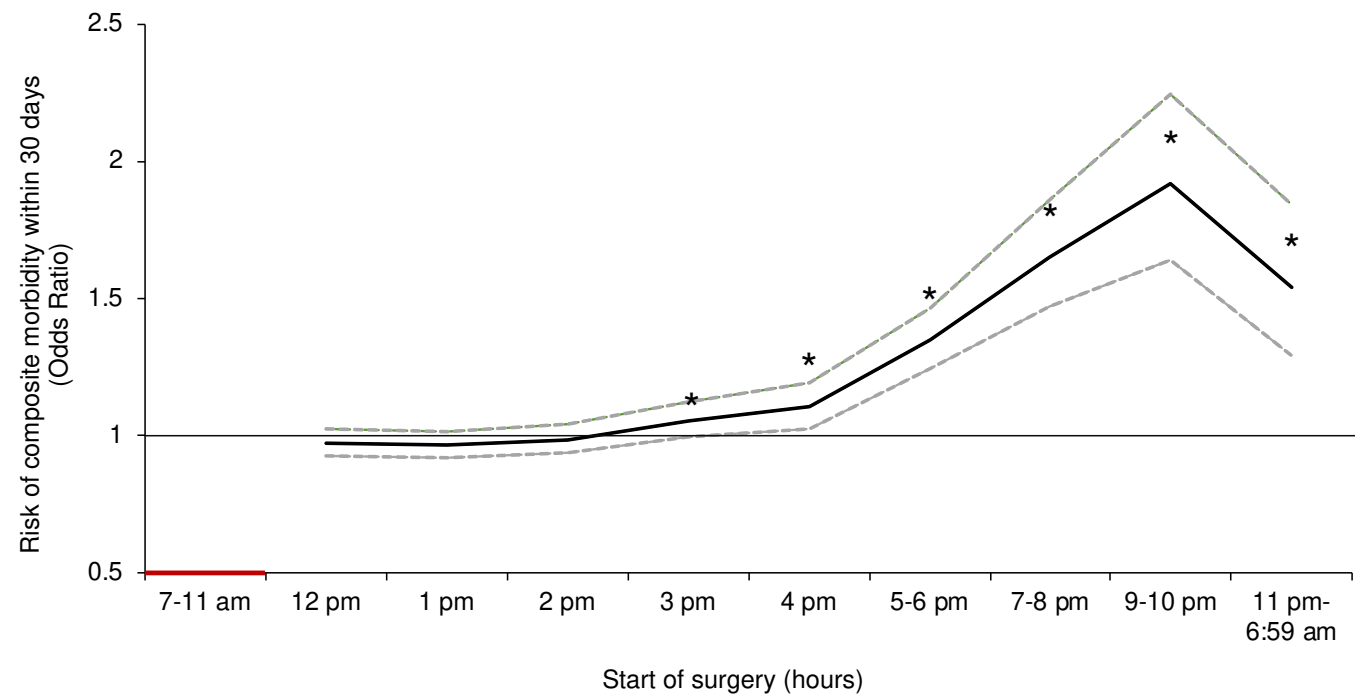

**eFigure 3. Proportion of handovers between anaesthesiologists throughout the day**

The percentage of handovers between anaesthesiologists occurring between 5 pm and 7 pm is 57 %. Overall, 65 % versus 35 % of handovers occurred during the night and day surgery periods, respectively. Patients undergoing night surgery were also disproportionately affected by multiple handovers (0.36 % of patients during day versus 0.99 % during night surgeries).

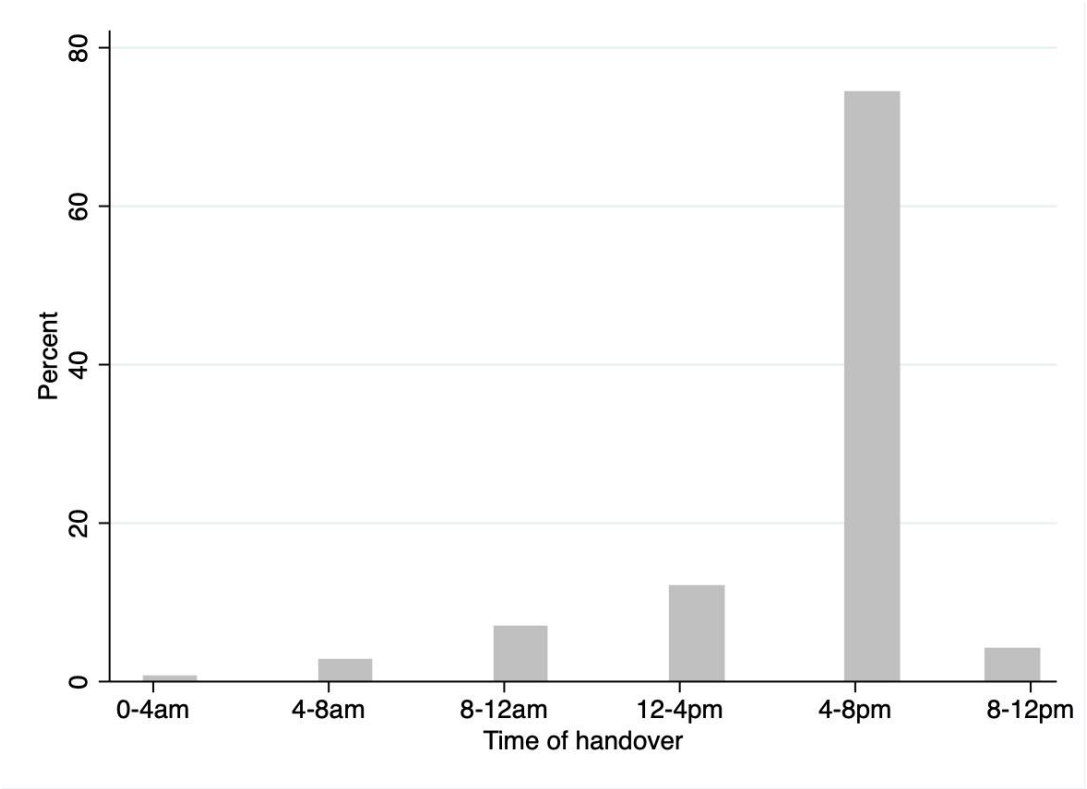

## 9 References

1. Althoff FC, Neb H, Herrmann E, et al. Multimodal Patient Blood Management Program Based on a Three-pillar Strategy: A Systematic Review and Meta-analysis. *Annals of surgery* 2019;269(5):794-804. doi: 10.1097/sla.0000000000003095 [published Online First: 2018/11/13]
2. Hallet J, Mahar AL, Tsang ME, et al. The impact of peri-operative blood transfusions on post-pancreatectomy short-term outcomes: an analysis from the American College of Surgeons National Surgical Quality Improvement Program. *HPB : the official journal of the International Hepato Pancreato Biliary Association* 2015;17(11):975-82. doi: 10.1111/hpb.12473 [published Online First: 2015/08/25]
3. Meybohm P, Herrmann E, Steinbicker AU, et al. Patient Blood Management is Associated With a Substantial Reduction of Red Blood Cell Utilization and Safe for Patient's Outcome: A Prospective, Multicenter Cohort Study With a Noninferiority Design. *Annals of surgery* 2016;264(2):203-11. doi: 10.1097/sla.0000000000001747 [published Online First: 2016/05/11]
4. Rohde JM, Dimcheff DE, Blumberg N, et al. Health care-associated infection after red blood cell transfusion: a systematic review and meta-analysis. *JAMA* 2014;311(13):1317-26. doi: 10.1001/jama.2014.2726 [published Online First: 2014/04/03]
5. Jones PM, Cherry RA, Allen BN, et al. Association Between Handover of Anesthesia Care and Adverse Postoperative Outcomes Among Patients Undergoing Major Surgery. *JAMA* 2018;319(2):143-53. doi: 10.1001/jama.2017.20040
6. Kidney Disease: Improving Global Outcomes (KDIGO) KDIGO Clinical Practice Guideline for Acute Kidney Injury. Acute Kidney Injury Work Group: Kidney Int Suppl, 2012.

7. Mehta RL, Kellum Ja Fau - Shah SV, Shah Sv Fau - Molitoris BA, et al. Acute Kidney Injury Network: report of an initiative to improve outcomes in acute kidney injury. (1466-609X (Electronic))
8. Shin CH, Long DR, McLean D, et al. Effects of Intraoperative Fluid Management on Postoperative Outcomes: A Hospital Registry Study. (1528-1140 (Electronic))
9. Santer P, Zheng S, Hammer M, et al. Ventilatory frequency during intraoperative mechanical ventilation and postoperative pulmonary complications: a hospital registry study. (1471-6771 (Electronic))
10. Schaefer MS, Raub D, Xu X, et al. Association between propofol dose and 1-year mortality in patients with or without a diagnosis of solid cancer. (1471-6771 (Electronic))
11. Kork F, Spies C, Conrad T, et al. Associations of postoperative mortality with the time of day, week and year. *Anaesthesia* 2018;73(6):711-18. doi: 10.1111/anae.14228 [published Online First: 2018/02/24]
12. National Center for Biomedical Ontology, Current Procedural Terminology [Available from: <http://bioportal.bioontology.org/ontologies/CPT>].
13. Bulletin of the American College of Surgeons, 2016 CPT coding changes and their effects [Available from: <http://bulletin.facs.org/2016/01/2016-cpt-coding-changes-and-their-effects>].
14. Dalton JE, Kurz A Fau - Turan A, Turan A Fau - Mascha EJ, et al. Development and validation of a risk quantification index for 30-day postoperative mortality and morbidity in noncardiac surgical patients. (1528-1175 (Electronic))
15. Brueckmann B, Villa-Urbe JI Fau - Bateman BT, Bateman Bt Fau - Grosse-Sundrup M, et al. Development and validation of a score for prediction of postoperative respiratory complications. (1528-1175 (Electronic))

16. McLean DJ, Diaz-Gil D Fau - Farhan HN, Farhan Hn Fau - Ladha KS, et al. Dose-dependent Association between Intermediate-acting Neuromuscular-blocking Agents and Postoperative Respiratory Complications. (1528-1175 (Electronic))
